# Supplementary material for: Improving preeclampsia risk prediction by modeling pregnancy trajectories from routinely collected electronic medical record data
Source: PubMed Central journal article supplement (PMC9170686; doi:10.1038/s41746-022-00612-x), 2022-06-06
Supplement: 41746_2022_612_MOESM1_ESM.pdf [file 41746_2022_612_MOESM1_ESM.pdf]

## Supplementary Material

### Improving Preeclampsia Risk Prediction by Modeling Pregnancy Trajectories from Routinely Collected Electronic Medical Record Data

Shilong Li<sup>1†</sup>, Zichen Wang<sup>1†</sup>, Luciana A. Vieira<sup>2</sup>, Amanda B. Zheutlin<sup>1</sup>, Boshu Ru<sup>1</sup>, Emilio Schadt<sup>1</sup>, Pei Wang<sup>4</sup>, Alan B. Copperman<sup>1,2,3</sup>, Joanne Stone<sup>2</sup>, Susan J. Gross<sup>1,4</sup>, Yu-Han Kao<sup>1</sup>, Yan Kwan Lau<sup>1</sup>, Siobhan M. Dolan<sup>2,4</sup>, Eric E. Schadt<sup>1,4\*</sup>, Li Li<sup>1,4\*</sup>

<sup>1</sup>Sema4, Stamford, CT, USA.

<sup>2</sup>Department of Obstetrics, Gynecology, and Reproductive Science, Icahn School of Medicine at Mount Sinai, New York, NY, USA.

<sup>3</sup>Department of Genetics and Genomic Sciences, The Icahn Institute for Genomics and Multiscale Biology, Icahn School of Medicine at Mount Sinai, New York, NY, USA.

<sup>4</sup>Reproductive Endocrinology and Infertility, Reproductive Medicine associates of New York, New York, USA.

<sup>†</sup>These authors contributed equally to this work

\*Corresponding author. E-mail: [li.li@sema4.com](mailto:li.li@sema4.com); [eric.schadt@sema4.com](mailto:eric.schadt@sema4.com)

## Supplementary Figures

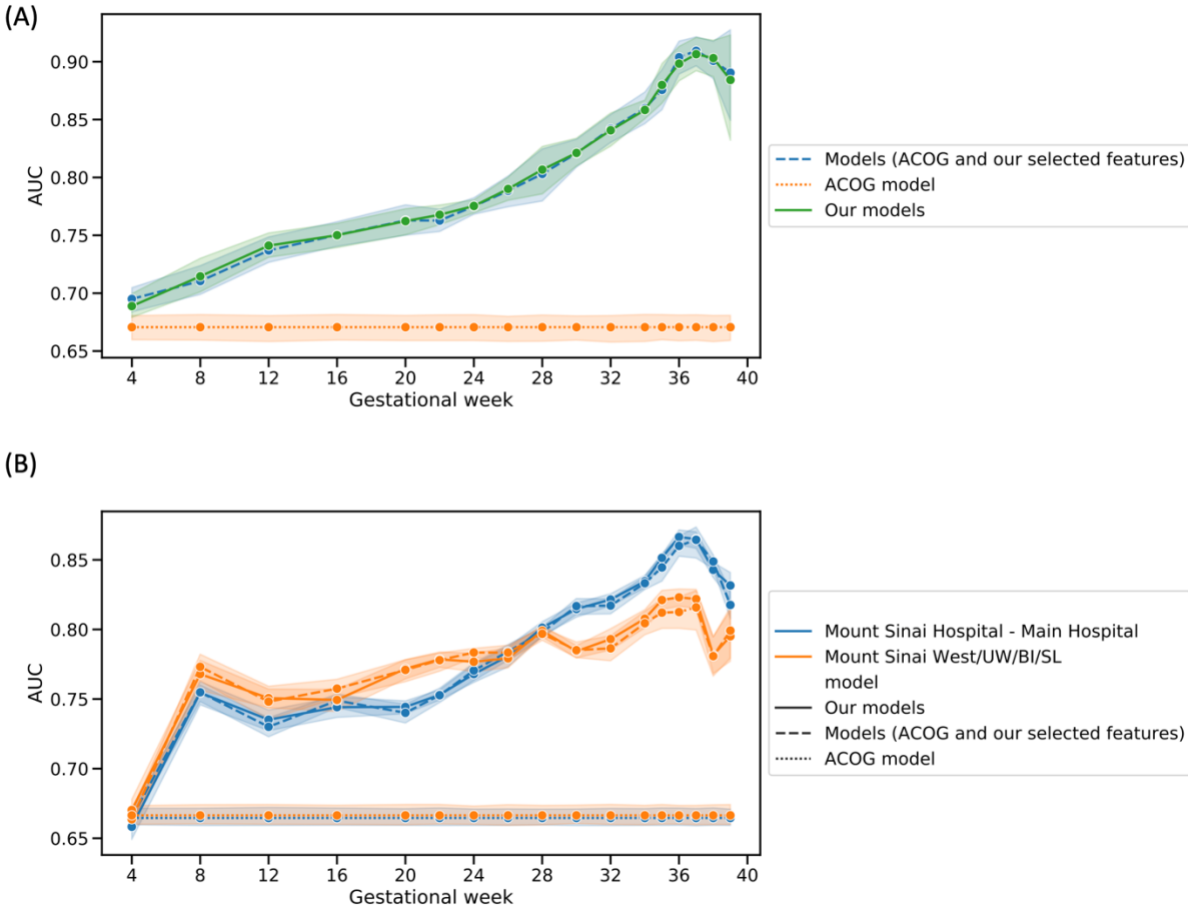

**Supplementary Figure 1:** Model performance comparisons and gains among our models, models with ACOG criteria on top of our selected features, and the model using ACOG criteria alone. (A) training performance at training dataset; (B) test performances at two independent datasets

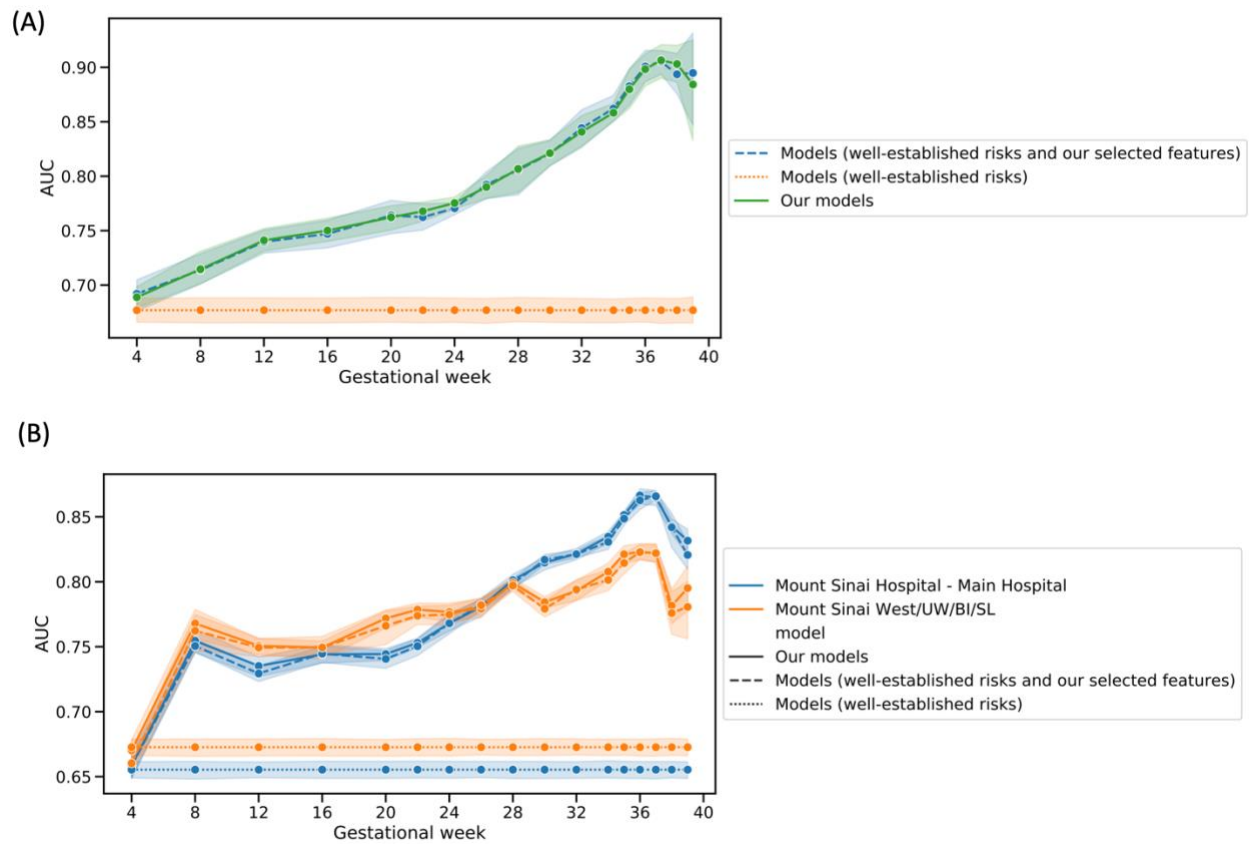

**Supplementary Figure 2:** Model performance comparisons and gains among our models, models with well-established risks on top of our selected features, and the model using well-established risks alone. (A) training performance at training dataset; (B) test performances at two independent datasets

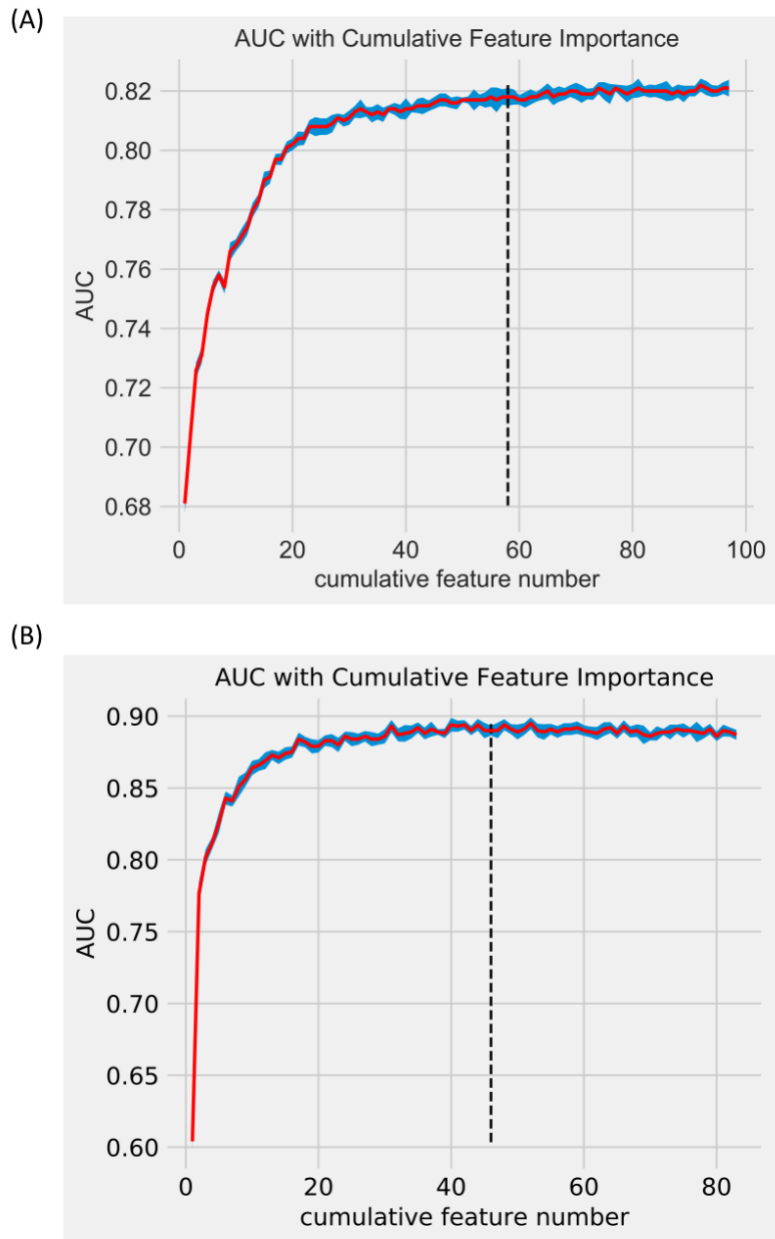

**Supplementary Figure 3:** AUC score of features cumulation. (A) intrapartum; (B) postpartum

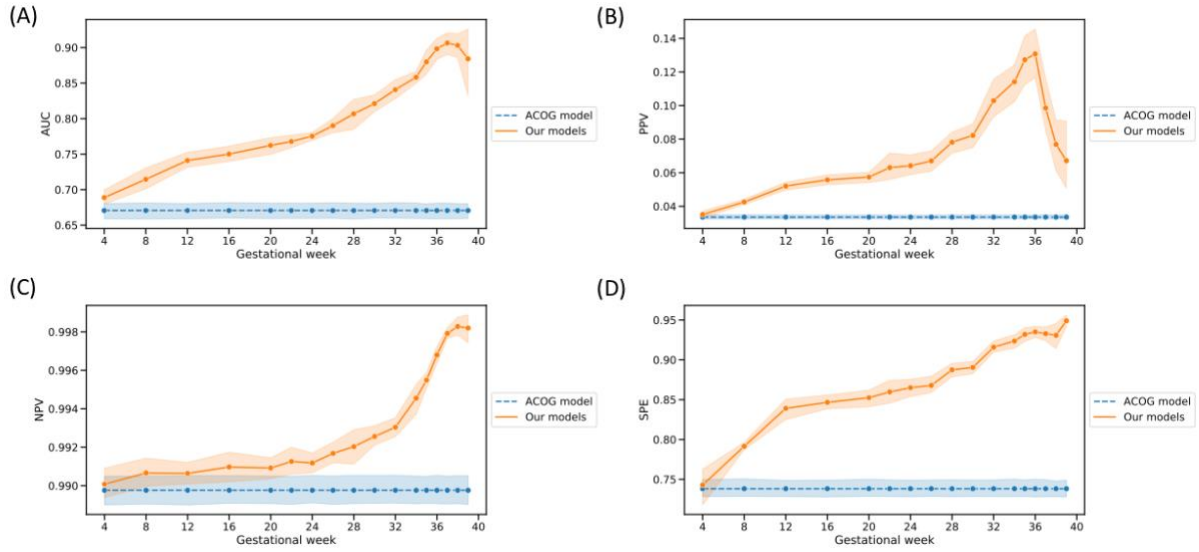

**Supplementary Figure 4:** Model performance comparisons between our model with ACOG model using the MSH training dataset. (A) Area under receiver operating characteristic curve (AUC). (B) Positive predictive value (PPV). (C) Negative predictive value (NPV). (D) Specificity (SPE)

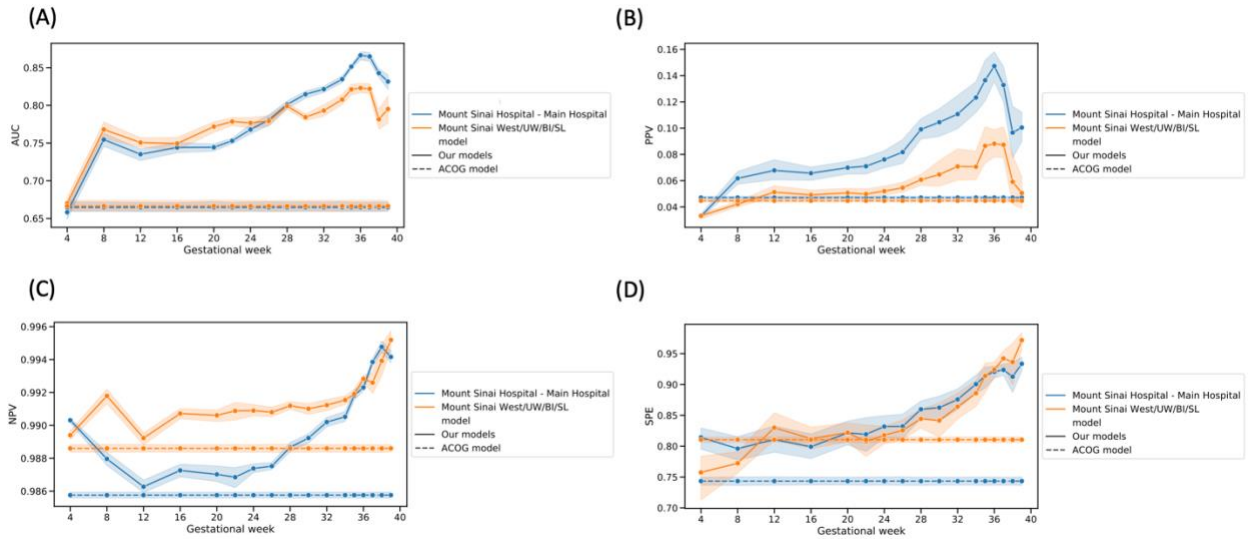

**Supplementary Figure 5:** Model performance comparisons between our model with ACOG model in the two independent datasets. (A) Area under receiver operating characteristic curve (AUC). (B) Positive predictive value (PPV). (C) Negative predictive value (NPV). (D) Specificity (SPE)

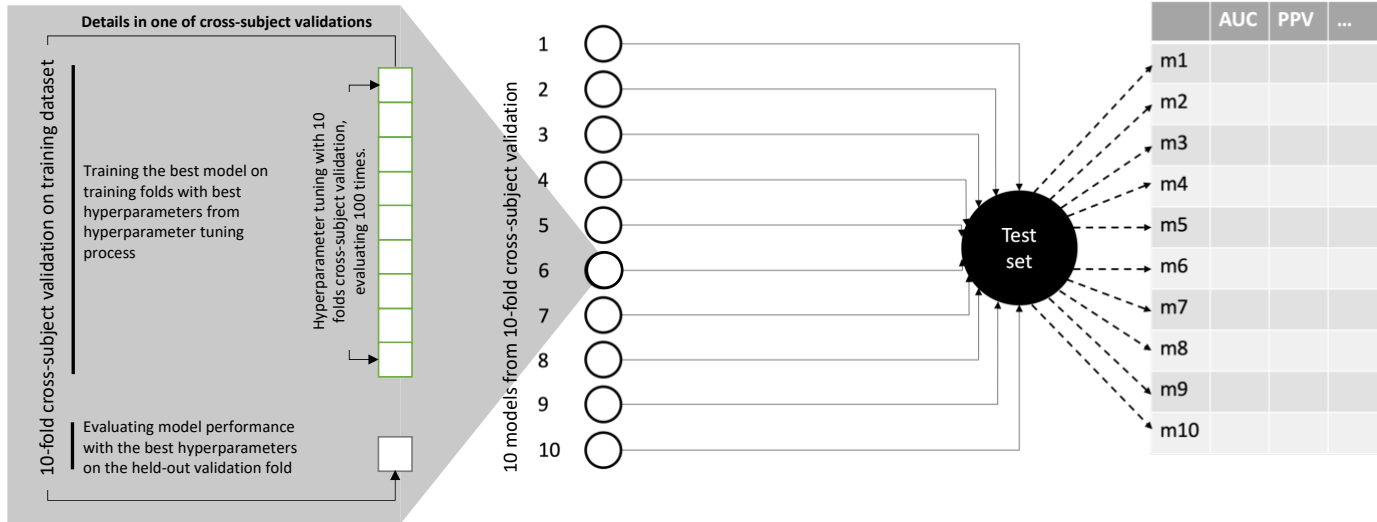

**STEP 1**

In each cross-subject validation, we did feature engineering, feature selection, hyperparameter tuning 100 times to select best hyperparameters to train the final best model, and evaluated the best model on the held-out validation fold.

**STEP 2**

We applied the 10 best trained model, each from each cross-subject validation, on the test set (i.e.; 10 trained models, m1 to m10)

**STEP 3**

We reported the performance metrics – AUC, PPV, NPV, SENS, SPEC, F1, ACC, AP – as the average of the 10 final best models.

1

2

3

**Supplementary Figure 6: Steps in model building and evaluation**

Supplementary Table 1: Selected unique features for model week 4

| Source feature                                  | Feature importance | Estimate     | Adjusted odds ratio | p-value     | type  | Known associations |
|-------------------------------------------------|--------------------|--------------|---------------------|-------------|-------|--------------------|
| age_preg                                        | 3.89               | 0.017295784  | 1.017446223         | 0.550880887 | demo  | Y                  |
| <b>SYSTOLIC BLOOD PRESSURE</b>                  | 2.43               | 0.33475149   | 1.397593027         | 4.03249E-74 | vital | Y                  |
| <b>DIASTOLIC BLOOD PRESSURE</b>                 | 1.85               | 0.31477006   | 1.369944269         | 1.29053E-56 | vital | Y                  |
| African_American                                | 1.28               | 0.955756514  | 2.600637259         | 1.1267E-52  | demo  | N                  |
| pe_hist                                         | 1.17               | 2.45635387   | 11.66221198         | 3.7361E-154 | demo  | Y                  |
| Caucasian                                       | 1.15               | -0.686828704 | 0.50316924          | 2.59001E-31 | demo  | N                  |
| medicaid                                        | 1.03               | 0.640257955  | 1.896970148         | 3.24087E-28 | demo  | N                  |
| <b>Other female genital disorders</b>           | 1.02               | 0.021272725  | 1.021500603         | 6.40031E-06 | dx    | N                  |
| <b>WEIGHT</b>                                   | 0.94               | 0.185615074  | 1.203958737         | 8.10297E-23 | vital | Y                  |
| Hispanic                                        | 0.82               | 0.412908536  | 1.511206799         | 1.08281E-09 | demo  | N                  |
| Asian                                           | 0.68               | -0.507282478 | 0.602129658         | 0.000111467 | demo  | N                  |
| <b>MEAN CORP. VOLUME</b>                        | 0.61               | -0.084442121 | 0.919024846         | 1.41535E-05 | lab   | N                  |
| <b>Contraceptive and procreative management</b> | 0.6                | 0.00690972   | 1.006933647         | 0.229379453 | dx    | N                  |
| <b>TEMPERATURE</b>                              | 0.52               | -0.092326185 | 0.911807683         | 8.15368E-05 | vital | N                  |
| Propofol                                        | 0.5                | -0.011373243 | 0.988691188         | 0.35733058  | rx    | N                  |
| <b>PULSE</b>                                    | 0.49               | 0.197880047  | 1.218816184         | 1.99776E-16 | vital | N                  |
| <b>Headache; including migraine</b>             | 0.42               | 0.047285439  | 1.048421227         | 1.61654E-14 | dx    | Y                  |
| <b>Menstrual disorders</b>                      | 0.38               | 0.004744737  | 1.004756011         | 0.436202365 | dx    | N                  |
| <b>RBC BLOOD CELL</b>                           | 0.37               | 0.081440293  | 1.084848443         | 0.002882815 | lab   | N                  |



**Supplementary Table 2: Selected unique features for model week 8**

| Source feature                                                                               | Feature importance | Estimate | Adjusted odds ratio | p-value  | type  | Known associations |
|----------------------------------------------------------------------------------------------|--------------------|----------|---------------------|----------|-------|--------------------|
| <b>SYSTOLIC BLOOD PRESSURE</b>                                                               | 2.56               | 0.279953 | 1.323067            | 7.93E-27 | vital | Y                  |
| age_preg                                                                                     | 2.45               | 0.017296 | 1.017446            | 0.550881 | demo  | Y                  |
| <b>DIASTOLIC BLOOD PRESSURE</b>                                                              | 1.98               | 0.367213 | 1.443705            | 1.46E-76 | vital | Y                  |
| African_American                                                                             | 1.25               | 0.955757 | 2.600637            | 1.13E-52 | demo  | N                  |
| pe_hist                                                                                      | 1.21               | 2.456354 | 11.66221            | 3.7E-154 | demo  | Y                  |
| intrauterine fetal demise                                                                    | 0.89               | 0.02407  | 1.024362            | 1.29E-21 | dx    | N                  |
| Hispanic                                                                                     | 0.85               | 0.412909 | 1.511207            | 1.08E-09 | demo  | N                  |
| <b>WEIGHT</b>                                                                                | 0.81               | 0.247785 | 1.281185            | 2.04E-23 | vital | Y                  |
| medicaid                                                                                     | 0.77               | 0.640258 | 1.89697             | 3.24E-28 | demo  | N                  |
| Caucasian                                                                                    | 0.75               | -0.68683 | 0.503169            | 2.59E-31 | demo  | N                  |
| <b>VARICELLA-ZOSTER IGG</b>                                                                  | 0.59               | -0.00482 | 0.995191            | 0.876679 | lab   | N                  |
| <b>RED DISTRIB. WIDTH</b>                                                                    | 0.51               | 0.04901  | 1.050231            | 0.037474 | lab   | N                  |
| <b>PLATELET</b>                                                                              | 0.49               | -0.03393 | 0.966636            | 0.2227   | lab   | N                  |
| <b>MEAN CORP. VOLUME</b>                                                                     | 0.48               | -0.09731 | 0.907273            | 2.92E-05 | lab   | N                  |
| Asian                                                                                        | 0.47               | -0.50728 | 0.60213             | 0.000111 | demo  | N                  |
| <b>MEAN PLT VOLUME</b>                                                                       | 0.44               | 0.088326 | 1.092344            | 0.001523 | lab   | N                  |
| <b>WHITE BLOOD CELL</b>                                                                      | 0.43               | 0.03073  | 1.031207            | 0.280015 | lab   | Y                  |
| <b>HEMOGLOBIN</b>                                                                            | 0.39               | 0.005777 | 1.005793            | 0.84231  | lab   | Y                  |
| <b>PULSE</b>                                                                                 | 0.32               | 0.257451 | 1.293629            | 3.02E-26 | vital | N                  |
| <b>MEAN CORP. HGB CONC.</b>                                                                  | 0.32               | 0.105064 | 1.110782            | 9.13E-05 | lab   | N                  |
| <b>HEMATOCRIT</b>                                                                            | 0.32               | 0.05731  | 1.058984            | 0.028526 | lab   | N                  |
| <b>RBC BLOOD CELL</b>                                                                        | 0.32               | -0.03734 | 0.963344            | 0.188939 | lab   | N                  |
| <b>Other screening for suspected conditions (not mental disorders or infectious disease)</b> | 0.32               | 0.012794 | 1.012876            | 5.4E-08  | dx    | N                  |

Supplementary Table 3: Selected unique features for model week 12

| Source feature                                                                               | Feature importance | Estimate     | Adjusted odds ratio | p-value  | type  | Known associations |
|----------------------------------------------------------------------------------------------|--------------------|--------------|---------------------|----------|-------|--------------------|
| age_preg                                                                                     | 2.84               | 0.017303983  | 1.017455            | 0.550692 | demo  | Y                  |
| pe_hist                                                                                      | 2.19               | 2.456335571  | 11.662              | 3.8E-154 | demo  | Y                  |
| <b>SYSTOLIC BLOOD PRESSURE</b>                                                               | 2.09               | 0.322498107  | 1.380572            | 6.56E-32 | vital | Y                  |
| <b>DIASTOLIC BLOOD PRESSURE</b>                                                              | 1.82               | 0.418160206  | 1.519164            | 1.21E-93 | vital | Y                  |
| African_American                                                                             | 1.58               | 0.955735195  | 2.600582            | 1.13E-52 | demo  | N                  |
| Caucasian                                                                                    | 1.07               | -0.686797208 | 0.503185            | 2.61E-31 | demo  | N                  |
| <b>WEIGHT</b>                                                                                | 0.95               | 0.335163704  | 1.398169            | 2.91E-39 | vital | Y                  |
| <b>Other screening for suspected conditions (not mental disorders or infectious disease)</b> | 0.68               | 0.005166863  | 1.00518             | 0.00067  | dx    | N                  |
| <b>MEAN CORP. VOLUME</b>                                                                     | 0.66               | 0.051727137  | 1.053088            | 0.032007 | lab   | N                  |
| higher order multiplee                                                                       | 0.66               | 0.03192773   | 1.032443            | 9.01E-07 | dx    | N                  |
| Hispanic                                                                                     | 0.65               | 0.412886639  | 1.511174            | 1.09E-09 | demo  | N                  |
| <b>RED DISTRIB. WIDTH</b>                                                                    | 0.64               | 0.101008717  | 1.106286            | 5.17E-09 | lab   | N                  |
| <b>MEAN CORP. HGB CONC.</b>                                                                  | 0.63               | -0.138477477 | 0.870683            | 1.06E-07 | lab   | N                  |
| medicaid                                                                                     | 0.62               | 0.640315037  | 1.897078            | 3.21E-28 | demo  | N                  |
| <b>PH - DIPSTICK</b>                                                                         | 0.62               | 0.044755097  | 1.045772            | 0.115067 | lab   | N                  |
| <b>RBC BLOOD CELL</b>                                                                        | 0.6                | 0.067813999  | 1.070166            | 0.015482 | lab   | N                  |
| <b>MEAN CORP. HGB</b>                                                                        | 0.57               | -0.043569692 | 0.957366            | 0.121727 | lab   | N                  |
| <b>PLATELET</b>                                                                              | 0.53               | -0.07384261  | 0.928818            | 0.001703 | lab   | N                  |
| Menstrual disorders                                                                          | 0.53               | -0.002196103 | 0.997806            | 0.32397  | dx    | N                  |
| <b>LYMPHOCYTE %</b>                                                                          | 0.53               | 0.205215813  | 1.22779             | 2.76E-15 | lab   | N                  |
| <b>MEAN PLT VOLUME</b>                                                                       | 0.51               | 0.042397733  | 1.043309            | 0.129841 | lab   | N                  |
| <b>PULSE</b>                                                                                 | 0.5                | 0.115064183  | 1.121945            | 8.21E-06 | vital | N                  |
| Asian                                                                                        | 0.49               | -0.50730215  | 0.602118            | 0.000111 | demo  | N                  |
| Oxytocin                                                                                     | 0.47               | -0.009023532 | 0.991017            | 0.638098 | rx    | N                  |
| <b>WHITE BLOOD CELL</b>                                                                      | 0.47               | -0.065756363 | 0.936359            | 0.016343 | lab   | Y                  |
| <b>HEMOGLOBIN</b>                                                                            | 0.45               | 0.024006407  | 1.024297            | 0.405191 | lab   | Y                  |
| <b>Other pregnancy and delivery including normal</b>                                         | 0.42               | 0.010441012  | 1.010496            | 2.82E-13 | dx    | N                  |
| <b>VARICELLA-ZOSTER IGG</b>                                                                  | 0.42               | -0.022978555 | 0.977283            | 0.537668 | lab   | N                  |
| <b>HEMATOCRIT</b>                                                                            | 0.4                | 0.292375893  | 1.339606            | 7.48E-27 | lab   | N                  |
| <b>QTC</b>                                                                                   | 0.35               | 0.211634956  | 1.235697            | 1.2E-41  | lab   | N                  |

Supplementary Table 4: Selected unique features for model week 16

| Source feature                                                                               | Feature importance | Estimate | Adjusted odds ratio | p-value  | type  | Known associations |
|----------------------------------------------------------------------------------------------|--------------------|----------|---------------------|----------|-------|--------------------|
| <b>SYSTOLIC BLOOD PRESSURE</b>                                                               | 2.96               | 0.37141  | 1.449777            | 1.07E-39 | vital | Y                  |
| age_preg                                                                                     | 2.8                | 0.017258 | 1.017408            | 0.551748 | demo  | Y                  |
| pe_hist                                                                                      | 2.79               | 2.456262 | 11.66114            | 3.8E-154 | demo  | Y                  |
| <b>DIASTOLIC BLOOD PRESSURE</b>                                                              | 2.22               | 0.446819 | 1.563331            | 4.6E-106 | vital | Y                  |
| African_American                                                                             | 1.75               | 0.956069 | 2.60145             | 1.04E-52 | demo  | N                  |
| twin pregnancy                                                                               | 1.19               | 0.022797 | 1.023059            | 3.39E-09 | dx    | N                  |
| <b>WEIGHT</b>                                                                                | 1.11               | 0.221214 | 1.247591            | 8.21E-30 | vital | Y                  |
| Caucasian                                                                                    | 1                  | -0.68697 | 0.5031              | 2.52E-31 | demo  | N                  |
| Hispanic                                                                                     | 0.83               | 0.413049 | 1.511419            | 1.07E-09 | demo  | N                  |
| <b>Other screening for suspected conditions (not mental disorders or infectious disease)</b> | 0.8                | 0.004822 | 1.004834            | 0.000388 | dx    | N                  |
| <b>PULSE</b>                                                                                 | 0.77               | -0.03132 | 0.969161            | 0.275455 | vital | N                  |
| <b>RED DISTRIB. WIDTH</b>                                                                    | 0.75               | -0.07223 | 0.930316            | 0.004888 | lab   | N                  |
| Headache; including migraine                                                                 | 0.7                | 0.031587 | 1.032091            | 4.35E-26 | dx    | Y                  |
| <b>U-PROTEIN</b>                                                                             | 0.68               | 0.303927 | 1.355171            | 3.71E-72 | lab   | Y                  |
| <b>MEAN CORP. VOLUME</b>                                                                     | 0.67               | -0.14404 | 0.86585             | 1.18E-12 | lab   | N                  |
| <b>PLATELET</b>                                                                              | 0.66               | 0.034389 | 1.034987            | 0.222239 | lab   | N                  |
| <b>MEAN CORP. HGB</b>                                                                        | 0.66               | -0.12481 | 0.882668            | 2.9E-07  | lab   | N                  |
| gestational hypertension                                                                     | 0.63               | 0.064516 | 1.066643            | 9.82E-87 | dx    | Y                  |
| <b>LYMPHOCYTE %</b>                                                                          | 0.61               | 0.209727 | 1.233342            | 1.59E-15 | lab   | N                  |
| <b>WHITE BLOOD CELL</b>                                                                      | 0.59               | 0.0764   | 1.079394            | 0.000328 | lab   | Y                  |
| medicaid                                                                                     | 0.54               | 0.640293 | 1.897036            | 3.22E-28 | demo  | N                  |
| <b>PH - DIPSTICK</b>                                                                         | 0.53               | 0.080683 | 1.084027            | 0.003703 | lab   | N                  |
| <b>HEMOGLOBIN</b>                                                                            | 0.53               | 0.043851 | 1.044827            | 0.121799 | lab   | Y                  |
| <b>HEMATOCRIT</b>                                                                            | 0.52               | -0.0674  | 0.934819            | 0.008571 | lab   | N                  |
| Other female genital disorders                                                               | 0.52               | 0.012553 | 1.012632            | 4.02E-10 | dx    | N                  |
| <b>MEAN CORP. HGB CONC.</b>                                                                  | 0.51               | -0.08618 | 0.917432            | 0.001618 | lab   | N                  |
| Oxytocin                                                                                     | 0.48               | -0.00914 | 0.990898            | 0.632377 | rx    | N                  |
| <b>MEAN PLT VOLUME</b>                                                                       | 0.47               | 0.103712 | 1.109281            | 4.5E-06  | lab   | N                  |
| Residual codes; unclassified                                                                 | 0.45               | 0.010302 | 1.010355            | 2.24E-09 | dx    | N                  |
| <b>RESPIRATIONS</b>                                                                          | 0.41               | -0.04347 | 0.957462            | 0.076876 | vital | N                  |
| <b>RBC BLOOD CELL</b>                                                                        | 0.4                | -0.09872 | 0.905994            | 0.000207 | lab   | N                  |
| <b>MONOCYTE %</b>                                                                            | 0.39               | 0.239263 | 1.270313            | 3.25E-21 | lab   | N                  |
| <b>URIC ACID-BLD</b>                                                                         | 0.39               | 0.246033 | 1.278941            | 5.12E-96 | lab   | N                  |
| <b>VARICELLA-ZOSTER IGG</b>                                                                  | 0.38               | -0.02732 | 0.973052            | 0.480327 | lab   | N                  |
| <b>CREATININE-SERUM</b>                                                                      | 0.38               | 0.019701 | 1.019896            | 0.032606 | lab   | N                  |
| <b>LDH-BLD</b>                                                                               | 0.36               | 0.248244 | 1.281773            | 2.01E-76 | lab   | N                  |

**Supplementary Table 5: Selected unique features for model week 20**

| Source feature                                                                               | Feature importance | Estimate | Adjusted odds ratio | p-value  | type  | Known associations |
|----------------------------------------------------------------------------------------------|--------------------|----------|---------------------|----------|-------|--------------------|
| <b>SYSTOLIC BLOOD PRESSURE</b>                                                               | 2.57               | 0.398581 | 1.489709            | 1.34E-43 | vital | Y                  |
| age_preg                                                                                     | 1.98               | 0.016979 | 1.017124            | 0.558193 | demo  | Y                  |
| pe_hist                                                                                      | 1.46               | 2.455658 | 11.6541             | 4.6E-154 | demo  | Y                  |
| African_American                                                                             | 1.32               | 0.957462 | 2.605076            | 7.47E-53 | demo  | N                  |
| <b>DIASTOLIC BLOOD PRESSURE</b>                                                              | 1.31               | 0.462023 | 1.587282            | 1.9E-114 | vital | Y                  |
| twin pregnancy                                                                               | 1.06               | 0.02177  | 1.022009            | 2.38E-11 | dx    | N                  |
| U-PROTEIN                                                                                    | 0.92               | 0.360663 | 1.43428             | 2.2E-106 | lab   | Y                  |
| Caucasian                                                                                    | 0.82               | -0.68807 | 0.502545            | 2.03E-31 | demo  | N                  |
| <b>MEAN CORP. VOLUME</b>                                                                     | 0.79               | -0.10892 | 0.896802            | 7.08E-06 | lab   | N                  |
| <b>Other screening for suspected conditions (not mental disorders or infectious disease)</b> | 0.77               | 0.006107 | 1.006126            | 1.5E-06  | dx    | N                  |
| <b>HEMOGLOBIN</b>                                                                            | 0.69               | -0.04862 | 0.952542            | 0.077445 | lab   | Y                  |
| <b>WEIGHT</b>                                                                                | 0.63               | 0.244241 | 1.276652            | 9.38E-33 | vital | Y                  |
| <b>MEAN CORP. HGB CONC.</b>                                                                  | 0.55               | -0.00084 | 0.999162            | 0.976913 | lab   | N                  |
| <b>PULSE</b>                                                                                 | 0.5                | 0.08081  | 1.084165            | 0.003572 | vital | N                  |
| <b>MEAN CORP. HGB</b>                                                                        | 0.47               | 0.028392 | 1.028799            | 0.326841 | lab   | N                  |
| <b>Headache; including migraine</b>                                                          | 0.46               | 0.029865 | 1.030315            | 2.31E-30 | dx    | Y                  |
| <b>unspecified GDM</b>                                                                       | 0.46               | 0.028787 | 1.029205            | 5.63E-19 | dx    | N                  |
| <b>RBC BLOOD CELL</b>                                                                        | 0.45               | 0.072182 | 1.074851            | 0.008708 | lab   | N                  |
| <b>WHITE BLOOD CELL</b>                                                                      | 0.44               | 0.027093 | 1.027464            | 0.344867 | lab   | Y                  |
| <b>MEAN PLT VOLUME</b>                                                                       | 0.43               | 0.076747 | 1.079768            | 0.003209 | lab   | N                  |
| <b>HEMATOCRIT</b>                                                                            | 0.43               | 0.014924 | 1.015036            | 0.605565 | lab   | N                  |
| <b>Residual codes; unclassified</b>                                                          | 0.41               | 0.009419 | 1.009463            | 3.86E-10 | dx    | N                  |
| <b>URIC ACID-BLD</b>                                                                         | 0.4                | 0.286711 | 1.332039            | 4.5E-131 | lab   | N                  |
| <b>RED DISTRIB. WIDTH</b>                                                                    | 0.39               | 0.037371 | 1.038078            | 0.043907 | lab   | N                  |
| <b>VARICELLA-ZOSTER IGG</b>                                                                  | 0.38               | -0.0293  | 0.971121            | 0.456334 | lab   | N                  |
| <b>ALT(SGPT)</b>                                                                             | 0.37               | 0.032791 | 1.033335            | 0.110267 | lab   | N                  |
| <b>PLATELET</b>                                                                              | 0.37               | 0.008211 | 1.008245            | 0.63313  | lab   | N                  |
| <b>LYMPHOCYTE %</b>                                                                          | 0.37               | 0.280372 | 1.323622            | 2.13E-27 | lab   | N                  |
| <b>Hispanic</b>                                                                              | 0.36               | 0.41458  | 1.513735            | 9.29E-10 | demo  | N                  |
| <b>medicaid</b>                                                                              | 0.35               | 0.641008 | 1.898393            | 2.81E-28 | demo  | N                  |
| <b>U-CREATININE (TIMED)</b>                                                                  | 0.35               | 0.196095 | 1.216642            | 7.36E-59 | lab   | N                  |
| <b>Oxytocin</b>                                                                              | 0.34               | -0.00934 | 0.990704            | 0.62346  | rx    | N                  |
| <b>NEUTROPHIL %</b>                                                                          | 0.34               | 0.292534 | 1.339818            | 3.26E-26 | lab   | N                  |
| <b>PH - DIPSTICK</b>                                                                         | 0.33               | -0.04516 | 0.955841            | 0.117388 | lab   | N                  |
| <b>LDH-BLD</b>                                                                               | 0.3                | 0.277445 | 1.319753            | 3.01E-92 | lab   | N                  |

Supplementary Table 6: Selected unique features for model week 22

| Source feature                                                                        | Feature importance | Estimate | Adjusted odds ratio | p-value  | type  | Known associations |
|---------------------------------------------------------------------------------------|--------------------|----------|---------------------|----------|-------|--------------------|
| age_preg                                                                              | 4.39               | 0.016656 | 1.016795            | 0.565702 | demo  | Y                  |
| SYSTOLIC BLOOD PRESSURE                                                               | 3.51               | 0.416524 | 1.516681            | 2.48E-46 | vital | Y                  |
| pe_hist                                                                               | 3.5                | 2.454486 | 11.64045            | 6.4E-154 | demo  | Y                  |
| DIASTOLIC BLOOD PRESSURE                                                              | 2.78               | 0.486965 | 1.627369            | 2.4E-127 | vital | Y                  |
| African_American                                                                      | 2.59               | 0.960299 | 2.612478            | 3.77E-53 | demo  | N                  |
| twin pregnancy                                                                        | 2.1                | 0.021054 | 1.021277            | 4.23E-12 | dx    | N                  |
| RBC BLOOD CELL                                                                        | 1.69               | 0.039529 | 1.040321            | 0.170245 | lab   | N                  |
| Other screening for suspected conditions (not mental disorders or infectious disease) | 1.63               | 0.00736  | 1.007388            | 2.96E-09 | dx    | N                  |
| U-PROTEIN                                                                             | 1.59               | 0.382911 | 1.466547            | 1.2E-120 | lab   | Y                  |
| WEIGHT                                                                                | 1.47               | 0.234509 | 1.264288            | 1.14E-29 | vital | Y                  |
| RED DISTRIB. WIDTH                                                                    | 1.18               | 0.107171 | 1.113124            | 3.27E-08 | lab   | N                  |
| MEAN CORP. VOLUME                                                                     | 1.16               | -0.06277 | 0.939157            | 0.01369  | lab   | N                  |
| Caucasian                                                                             | 1.16               | -0.68975 | 0.5017              | 1.45E-31 | demo  | N                  |
| gestational hypertension                                                              | 1.1                | 0.059175 | 1.060961            | 1.4E-126 | dx    | Y                  |
| MEAN PLT VOLUME                                                                       | 1.09               | -0.00975 | 0.990299            | 0.736049 | lab   | N                  |
| MEAN CORP. HGB CONC.                                                                  | 1.08               | -0.05207 | 0.949263            | 0.065408 | lab   | N                  |
| LYMPHOCYTE %                                                                          | 0.98               | 0.28627  | 1.331452            | 2.2E-28  | lab   | N                  |
| Oxytocin                                                                              | 0.98               | -0.00988 | 0.990171            | 0.600301 | rx    | N                  |
| unspecified GDM                                                                       | 0.96               | 0.026182 | 1.026528            | 6.24E-18 | dx    | N                  |
| intrauterine fetal demise                                                             | 0.91               | 0.018371 | 1.018541            | 4.52E-45 | dx    | N                  |
| WHITE BLOOD CELL                                                                      | 0.9                | -0.01607 | 0.984055            | 0.585434 | lab   | Y                  |
| O2 SATURATION                                                                         | 0.89               | -0.02102 | 0.9792              | 0.60592  | vital | N                  |
| PH - DIPSTICK                                                                         | 0.87               | -0.11351 | 0.892693            | 5.21E-05 | lab   | N                  |
| advanced maternal age                                                                 | 0.82               | 0.003775 | 1.003782            | 0.025884 | dx    | Y                  |
| NEUTROPHIL #                                                                          | 0.82               | 0.273371 | 1.314388            | 3.94E-27 | lab   | N                  |
| PULSE                                                                                 | 0.79               | 0.190048 | 1.209308            | 1.63E-14 | vital | N                  |
| Headache; including migraine                                                          | 0.78               | 0.029206 | 1.029637            | 1.34E-31 | dx    | Y                  |
| VARICELLA-ZOSTER IGG                                                                  | 0.77               | -0.02881 | 0.9716              | 0.461866 | lab   | N                  |
| ALT(SGPT)                                                                             | 0.77               | 0.062956 | 1.06498             | 0.039941 | lab   | N                  |
| MEAN CORP. HGB                                                                        | 0.75               | -0.11052 | 0.895364            | 2.8E-06  | lab   | N                  |
| LDH-BLD                                                                               | 0.74               | 0.291921 | 1.338997            | 4.54E-97 | lab   | N                  |
| MONOCYTE %                                                                            | 0.74               | 0.275806 | 1.317592            | 9.58E-28 | lab   | N                  |
| HEMATOCRIT                                                                            | 0.74               | 0.045964 | 1.047037            | 0.099382 | lab   | N                  |
| SPEC GRAVITY-DIPSTICK                                                                 | 0.73               | 0.009235 | 1.009278            | 0.909824 | lab   | N                  |
| Other pregnancy and delivery including normal                                         | 0.69               | 0.010137 | 1.010189            | 5.23E-16 | dx    | N                  |
| HEMOGLOBIN                                                                            | 0.68               | 0.007741 | 1.007771            | 0.788199 | lab   | Y                  |
| medicaid                                                                              | 0.67               | 0.641573 | 1.899467            | 2.53E-28 | demo  | N                  |
| Residual codes; unclassified                                                          | 0.64               | 0.009026 | 1.009067            | 7.82E-11 | dx    | N                  |
| POTASSIUMBLD                                                                          | 0.64               | 0.272633 | 1.313418            | 1.37E-44 | lab   | N                  |
| HEIGHT                                                                                | 0.63               | 0.294155 | 1.341992            | 1.52E-26 | vital | N                  |

Supplementary Table 7: Selected unique features for model week 24

| Source feature                                                                        | Feature importance | Estimate | Adjusted odds ratio | p-value  | type  | Known associations |
|---------------------------------------------------------------------------------------|--------------------|----------|---------------------|----------|-------|--------------------|
| age_preg                                                                              | 4.38               | 0.017884 | 1.018045            | 0.537622 | demo  | Y                  |
| pe_hist                                                                               | 3.77               | 2.453614 | 11.6303             | 8.5E-154 | demo  | Y                  |
| SYSTOLIC BLOOD PRESSURE                                                               | 3.72               | 0.583687 | 1.792637            | 3.3E-215 | vital | Y                  |
| DIASTOLIC BLOOD PRESSURE                                                              | 3.34               | 0.514945 | 1.673547            | 3.2E-141 | vital | Y                  |
| African_American                                                                      | 2.61               | 0.960672 | 2.613452            | 4.27E-53 | demo  | N                  |
| twin pregnancy                                                                        | 2.37               | 0.021319 | 1.021548            | 8.74E-14 | dx    | N                  |
| Other screening for suspected conditions (not mental disorders or infectious disease) | 2.26               | 0.008617 | 1.008654            | 2.73E-12 | dx    | N                  |
| U-PROTEIN                                                                             | 1.95               | 0.405699 | 1.500351            | 1.5E-135 | lab   | Y                  |
| WEIGHT                                                                                | 1.8                | 0.281771 | 1.325476            | 2.1E-56  | vital | Y                  |
| MEAN CORP. HGB                                                                        | 1.76               | 0.068021 | 1.070388            | 0.014552 | lab   | N                  |
| unspecified GDM                                                                       | 1.72               | 0.025057 | 1.025374            | 7.48E-20 | dx    | N                  |
| WHITE BLOOD CELL                                                                      | 1.67               | 0.170879 | 1.186347            | 1.72E-13 | lab   | Y                  |
| MEAN CORP. VOLUME                                                                     | 1.4                | -0.09803 | 0.906626            | 2.23E-05 | lab   | N                  |
| FETAL FIBRONECTIN                                                                     | 1.38               | 0.083655 | 1.087254            | 0.0001   | lab   | N                  |
| gestational hypertension                                                              | 1.35               | 0.058596 | 1.060346            | 4E-142   | dx    | Y                  |
| intrauterine fetal demise                                                             | 1.22               | 0.017982 | 1.018145            | 7.08E-46 | dx    | N                  |
| RBC BLOOD CELL                                                                        | 1.17               | 0.031786 | 1.032296            | 0.266075 | lab   | N                  |
| Caucasian                                                                             | 1.15               | -0.69007 | 0.501541            | 1.42E-31 | demo  | N                  |
| Headache; including migraine                                                          | 1.11               | 0.029542 | 1.029983            | 3.23E-36 | dx    | Y                  |
| MONOCYTE %                                                                            | 1.06               | 0.259413 | 1.296169            | 1.45E-22 | lab   | N                  |
| RED DISTRIB. WIDTH                                                                    | 1                  | 0.04111  | 1.041967            | 0.1122   | lab   | N                  |
| HEMATOCRIT                                                                            | 0.97               | 0.017045 | 1.017191            | 0.556662 | lab   | N                  |
| HEMOGLOBIN                                                                            | 0.97               | 0.047942 | 1.04911             | 0.100017 | lab   | Y                  |
| LDH-BLD                                                                               | 0.97               | 0.304929 | 1.356528            | 1.9E-104 | lab   | N                  |
| Oxytocin                                                                              | 0.97               | 0.017167 | 1.017315            | 0.191914 | rx    | N                  |
| MEAN PLT VOLUME                                                                       | 0.96               | 0.054641 | 1.056162            | 0.054351 | lab   | N                  |
| ALT(SGPT)                                                                             | 0.94               | 0.085953 | 1.089755            | 0.000419 | lab   | N                  |
| MEAN CORP. HGB CONC.                                                                  | 0.9                | -0.08213 | 0.921149            | 0.003598 | lab   | N                  |
| LYMPHOCYTE %                                                                          | 0.88               | 0.2976   | 1.346623            | 1.8E-30  | lab   | N                  |
| RESPIRATIONS                                                                          | 0.87               | 0.041982 | 1.042876            | 0.028083 | vital | N                  |
| PH - DIPSTICK                                                                         | 0.84               | -0.01745 | 0.9827              | 0.545635 | lab   | N                  |
| PULSE                                                                                 | 0.77               | 0.095485 | 1.100193            | 0.000594 | vital | N                  |
| VARICELLA-ZOSTER IGG                                                                  | 0.73               | -0.02805 | 0.972343            | 0.470532 | lab   | N                  |
| nonreassuring fetal status                                                            | 0.71               | 0.00258  | 1.002583            | 0.038058 | dx    | N                  |
| POTASSIUMBLD                                                                          | 0.7                | 0.285293 | 1.330151            | 1.58E-48 | lab   | N                  |
| O2 SATURATION                                                                         | 0.7                | -0.02916 | 0.971262            | 0.496507 | vital | N                  |
| Contraceptive and procreative management                                              | 0.7                | 0.005034 | 1.005046            | 0.020523 | dx    | N                  |
| NEUTROPHIL #                                                                          | 0.65               | 0.2875   | 1.333091            | 8.19E-30 | lab   | N                  |

Supplementary Table 8: Selected unique features for model week 26

| Source feature                                                                               | Feature importance | Estimate | Adjusted odds ratio | p-value  | type  | Known associations |
|----------------------------------------------------------------------------------------------|--------------------|----------|---------------------|----------|-------|--------------------|
| <b>SYSTOLIC BLOOD PRESSURE</b>                                                               | 3.6                | 0.456552 | 1.578622            | 5.44E-52 | vital | Y                  |
| age_preg                                                                                     | 2.76               | 0.015092 | 1.015207            | 0.604166 | demo  | Y                  |
| <b>DIASTOLIC BLOOD PRESSURE</b>                                                              | 2.32               | 0.533845 | 1.705478            | 1.8E-151 | vital | Y                  |
| pe_hist                                                                                      | 2.23               | 2.449529 | 11.58289            | 1E-151   | demo  | Y                  |
| African_American                                                                             | 1.61               | 0.964382 | 2.623166            | 4.17E-53 | demo  | N                  |
| twin pregnancy                                                                               | 1.38               | 0.020733 | 1.020949            | 6.93E-14 | dx    | N                  |
| <b>U-PROTEIN</b>                                                                             | 1.32               | 0.42952  | 1.53652             | 1.9E-150 | lab   | Y                  |
| <b>WEIGHT</b>                                                                                | 1.15               | -0.12492 | 0.88257             | 5.25E-09 | vital | Y                  |
| gestational hypertension                                                                     | 1.08               | 0.057529 | 1.059216            | 9.2E-170 | dx    | Y                  |
| <b>Other screening for suspected conditions (not mental disorders or infectious disease)</b> | 1.02               | 0.008511 | 1.008547            | 4.58E-12 | dx    | N                  |
| <b>FETAL FIBRONECTIN</b>                                                                     | 0.94               | 0.116482 | 1.123538            | 3.56E-08 | lab   | N                  |
| <b>MEAN CORP. VOLUME</b>                                                                     | 0.91               | -0.05542 | 0.946092            | 0.030968 | lab   | N                  |
| Oxytocin                                                                                     | 0.85               | -0.01024 | 0.989808            | 0.577733 | rx    | N                  |
| Caucasian                                                                                    | 0.85               | -0.69023 | 0.501463            | 2.21E-31 | demo  | N                  |
| <b>URIC ACID-BLD</b>                                                                         | 0.81               | 0.349676 | 1.418607            | 2.1E-189 | lab   | N                  |
| Headache; including migraine                                                                 | 0.81               | 0.029708 | 1.030154            | 2.37E-40 | dx    | Y                  |
| <b>MEAN CORP. HGB</b>                                                                        | 0.78               | -0.10406 | 0.901175            | 3.12E-05 | lab   | N                  |
| <b>MEAN PLT VOLUME</b>                                                                       | 0.76               | 0.065406 | 1.067592            | 0.016785 | lab   | N                  |
| <b>HEMATOCRIT</b>                                                                            | 0.74               | 0.004679 | 1.00469             | 0.871946 | lab   | N                  |
| unspecified GDM                                                                              | 0.68               | 0.019413 | 1.019602            | 1.59E-16 | dx    | N                  |
| <b>RBC BLOOD CELL</b>                                                                        | 0.65               | 0.004744 | 1.004755            | 0.870551 | lab   | N                  |
| <b>LDH-BLD</b>                                                                               | 0.62               | 0.328358 | 1.388686            | 1.6E-120 | lab   | N                  |
| <b>MEAN CORP. HGB CONC.</b>                                                                  | 0.61               | -0.08447 | 0.919002            | 0.002656 | lab   | N                  |
| <b>MONOCYTE %</b>                                                                            | 0.6                | 0.254296 | 1.289554            | 3.9E-21  | lab   | N                  |
| <b>PLATELET</b>                                                                              | 0.59               | -0.01539 | 0.984729            | 0.850649 | lab   | N                  |
| <b>HEMOGLOBIN</b>                                                                            | 0.58               | 0.036373 | 1.037043            | 0.214696 | lab   | Y                  |
| <b>WHITE BLOOD CELL</b>                                                                      | 0.54               | 0.000882 | 1.000882            | 0.975803 | lab   | Y                  |
| <b>PULSE</b>                                                                                 | 0.53               | -0.1237  | 0.883647            | 8.1E-07  | vital | N                  |
| <b>ALT(SGPT)</b>                                                                             | 0.52               | 0.178881 | 1.195878            | 4.15E-24 | lab   | N                  |
| <b>RED DISTRIB. WIDTH</b>                                                                    | 0.5                | 0.044961 | 1.045987            | 0.080831 | lab   | N                  |
| <b>NEUTROPHIL %</b>                                                                          | 0.47               | 0.329653 | 1.390485            | 1.12E-30 | lab   | N                  |
| medicaid                                                                                     | 0.46               | 0.646144 | 1.908169            | 1.73E-28 | demo  | N                  |
| Abdominal pain                                                                               | 0.44               | 0.014128 | 1.014228            | 2.19E-16 | dx    | N                  |
| <b>O2 SATURATION</b>                                                                         | 0.44               | -0.00044 | 0.999565            | 0.987891 | vital | N                  |
| <b>CREATININE-SERUM</b>                                                                      | 0.42               | 0.016216 | 1.016348            | 0.056421 | lab   | N                  |
| intrauterine fetal demise                                                                    | 0.42               | 0.017049 | 1.017195            | 1.88E-43 | dx    | N                  |

Supplementary Table 9: Selected unique features for model week 28

| Source feature                                                                               | Feature importance | Estimate     | Adjusted odds ratio | p-value     | type  | Known associations |
|----------------------------------------------------------------------------------------------|--------------------|--------------|---------------------|-------------|-------|--------------------|
| <b>SYSTOLIC BLOOD PRESSURE</b>                                                               | 4.41               | 0.512214682  | 1.668983372         | 4.02269E-61 | vital | Y                  |
| pe_hist                                                                                      | 2.71               | 2.443039566  | 11.50796686         | 2.3127E-149 | demo  | Y                  |
| age_preg                                                                                     | 2.52               | 0.013380352  | 1.01347027          | 0.646690228 | demo  | Y                  |
| <b>DIASTOLIC BLOOD PRESSURE</b>                                                              | 2.22               | 0.544736696  | 1.724154345         | 1.3919E-154 | vital | Y                  |
| gestational hypertension                                                                     | 2.08               | 0.058763921  | 1.060524843         | 1.5225E-217 | dx    | Y                  |
| <b>FETAL FIBRONECTIN</b>                                                                     | 1.86               | 0.132172366  | 1.141305024         | 7.78058E-10 | lab   | N                  |
| African_American                                                                             | 1.78               | 0.958251414  | 2.607133688         | 5.66104E-52 | demo  | N                  |
| twin pregnancy                                                                               | 1.74               | 0.021159419  | 1.021384867         | 5.39075E-16 | dx    | N                  |
| <b>MEAN CORP. HGB CONC.</b>                                                                  | 1.37               | -0.025549147 | 0.974774471         | 0.379547025 | lab   | N                  |
| <b>URIC ACID-BLD</b>                                                                         | 1.23               | 0.393031132  | 1.48146451          | 1.5065E-239 | lab   | N                  |
| <b>WEIGHT</b>                                                                                | 1.22               | 0.530978049  | 1.700594761         | 1.95923E-81 | vital | Y                  |
| <b>Other screening for suspected conditions (not mental disorders or infectious disease)</b> | 1.18               | 0.00898057   | 1.009021016         | 2.55257E-13 | dx    | N                  |
| <b>U-PROTEIN</b>                                                                             | 1.1                | 0.459908054  | 1.583928342         | 1.7393E-170 | lab   | Y                  |
| unspecified GDM                                                                              | 1.05               | 0.01940885   | 1.019598426         | 2.7706E-25  | dx    | N                  |
| <b>MEAN CORP. HGB</b>                                                                        | 0.99               | -0.205194778 | 0.814488656         | 3.91702E-22 | lab   | N                  |
| Oxytocin                                                                                     | 0.84               | 0.006141983  | 1.006160884         | 0.675306733 | rx    | N                  |
| Headache; including migraine                                                                 | 0.83               | 0.030175582  | 1.030635479         | 3.88742E-46 | dx    | Y                  |
| ALT(SGPT)                                                                                    | 0.82               | 0.104839416  | 1.110532262         | 2.83936E-05 | lab   | N                  |
| PULSE                                                                                        | 0.8                | -0.041640114 | 0.959214926         | 0.147121222 | vital | N                  |
| LDH-BLD                                                                                      | 0.79               | 0.363703746  | 1.438647946         | 1.0446E-146 | lab   | N                  |
| RBC BLOOD CELL                                                                               | 0.78               | -0.083516953 | 0.919875492         | 0.003256881 | lab   | N                  |
| GLUCOSE 1 HR                                                                                 | 0.74               | 0.291362656  | 1.338249821         | 4.9838E-30  | lab   | N                  |
| <b>MEAN CORP. VOLUME</b>                                                                     | 0.74               | -0.224295204 | 0.799079208         | 4.78285E-26 | lab   | N                  |
| Caucasian                                                                                    | 0.67               | -0.689189801 | 0.50198261          | 3.86791E-31 | demo  | N                  |
| <b>RED DISTRIB. WIDTH</b>                                                                    | 0.64               | 0.033679462  | 1.034253036         | 0.121623296 | lab   | N                  |
| <b>HEMOGLOBIN</b>                                                                            | 0.63               | 0.027761469  | 1.028150409         | 0.345772849 | lab   | Y                  |
| <b>RESPIRATIONS</b>                                                                          | 0.63               | -0.019629274 | 0.980562125         | 0.50688978  | vital | N                  |
| PretermL                                                                                     | 0.62               | 0.013270847  | 1.013359296         | 1.05858E-18 | dx    | N                  |
| <b>MEAN PLT VOLUME</b>                                                                       | 0.62               | 0.049258796  | 1.050492179         | 0.090528959 | lab   | N                  |
| <b>MONOCYTE %</b>                                                                            | 0.61               | 0.318910277  | 1.375627894         | 3.24204E-34 | lab   | N                  |
| Allergic reactions                                                                           | 0.58               | 0.014309355  | 1.014412224         | 1.38983E-16 | dx    | N                  |
| <b>WHITE BLOOD CELL</b>                                                                      | 0.58               | 0.106001884  | 1.111823971         | 3.84622E-05 | lab   | Y                  |
| HEMATOCRIT                                                                                   | 0.58               | -0.006437887 | 0.993582792         | 0.825233055 | lab   | N                  |
| PLATELET                                                                                     | 0.57               | 0.010838536  | 1.010897486         | 0.290237264 | lab   | N                  |



**Supplementary Table 10: Selected unique features for model week 30**

| Source feature                                                                               | Feature importance | Estimate | Adjusted odds ratio | p-value  | type  | Known associations |
|----------------------------------------------------------------------------------------------|--------------------|----------|---------------------|----------|-------|--------------------|
| <b>SYSTOLIC BLOOD PRESSURE</b>                                                               | 3.58               | 0.538657 | 1.713704            | 1.1E-63  | vital | Y                  |
| pe_hist                                                                                      | 2.8                | 2.437368 | 11.44288            | 2.5E-146 | demo  | Y                  |
| age_preg                                                                                     | 2.25               | 0.016709 | 1.016849            | 0.570043 | demo  | Y                  |
| twin pregnancy                                                                               | 1.8                | 0.020292 | 1.020499            | 6.86E-16 | dx    | N                  |
| gestational hypertension                                                                     | 1.8                | 0.059017 | 1.060793            | 3.3E-273 | dx    | Y                  |
| <b>FETAL FIBRONECTIN</b>                                                                     | 1.67               | 0.155409 | 1.168135            | 6.81E-13 | lab   | N                  |
| <b>DIASTOLIC BLOOD PRESSURE</b>                                                              | 1.59               | 0.545168 | 1.724898            | 5.5E-152 | vital | Y                  |
| African_American                                                                             | 1.54               | 0.95883  | 2.608642            | 3.32E-51 | demo  | N                  |
| <b>URIC ACID-BLD</b>                                                                         | 1.39               | 0.428149 | 1.534415            | 3.1E-274 | lab   | N                  |
| <b>Other screening for suspected conditions (not mental disorders or infectious disease)</b> | 1.18               | 0.009458 | 1.009503            | 1.53E-14 | dx    | N                  |
| <b>MEAN CORP. VOLUME</b>                                                                     | 0.99               | -0.22836 | 0.795839            | 2.53E-26 | lab   | N                  |
| Headache; including migraine                                                                 | 0.98               | 0.030143 | 1.030602            | 1.58E-50 | dx    | Y                  |
| <b>WEIGHT</b>                                                                                | 0.96               | 0.239602 | 1.270744            | 1.83E-27 | vital | Y                  |
| <b>U-PROTEIN</b>                                                                             | 0.89               | 0.495144 | 1.640735            | 3.5E-194 | lab   | Y                  |
| <b>RED DISTRIB. WIDTH</b>                                                                    | 0.79               | 0.059003 | 1.060778            | 0.004377 | lab   | N                  |
| <b>MEAN CORP. HGB CONC.</b>                                                                  | 0.74               | -0.08015 | 0.922978            | 0.004978 | lab   | N                  |
| Oxytocin                                                                                     | 0.73               | 0.005843 | 1.00586             | 0.680944 | rx    | N                  |
| <b>PLATELET</b>                                                                              | 0.73               | 0.01577  | 1.015895            | 0.177961 | lab   | N                  |
| Caucasian                                                                                    | 0.7                | -0.68421 | 0.50449             | 2.5E-30  | demo  | N                  |
| intrauterine fetal demise                                                                    | 0.69               | 0.018431 | 1.018602            | 1.97E-57 | dx    | N                  |
| <b>MEAN CORP. HGB</b>                                                                        | 0.64               | -0.23514 | 0.790458            | 1.12E-24 | lab   | N                  |
| <b>Other pregnancy and delivery including normal</b>                                         | 0.62               | 0.004259 | 1.004268            | 0.000314 | dx    | N                  |
| <b>PULSE</b>                                                                                 | 0.6                | -0.07689 | 0.925994            | 0.005543 | vital | N                  |
| <b>MEAN PLT VOLUME</b>                                                                       | 0.6                | 0.036115 | 1.036775            | 0.216423 | lab   | N                  |
| <b>HEMATOCRIT</b>                                                                            | 0.59               | -0.01725 | 0.982903            | 0.557052 | lab   | N                  |
| <b>RBC BLOOD CELL</b>                                                                        | 0.58               | 0.175926 | 1.19235             | 1.18E-10 | lab   | N                  |
| <b>WHITE BLOOD CELL</b>                                                                      | 0.57               | 0.10515  | 1.110877            | 7.63E-05 | lab   | Y                  |
| <b>O2 SATURATION</b>                                                                         | 0.53               | -0.03036 | 0.970099            | 0.668428 | vital | N                  |
| <b>LYMPHOCYTE %</b>                                                                          | 0.52               | 0.342798 | 1.408884            | 3.11E-37 | lab   | N                  |
| <b>LDH-BLD</b>                                                                               | 0.5                | 0.399441 | 1.490992            | 1.4E-173 | lab   | N                  |
| <b>FIBRINOGEN</b>                                                                            | 0.5                | 0.45427  | 1.575024            | 4.6E-294 | lab   | N                  |
| <b>ALT(SGPT)</b>                                                                             | 0.5                | 0.106334 | 1.112193            | 1.84E-05 | lab   | N                  |
| <b>HEMOGLOBIN</b>                                                                            | 0.49               | 0.035909 | 1.036562            | 0.219787 | lab   | Y                  |
| <b>ALK PHOSPHATASE, BLD</b>                                                                  | 0.48               | 0.292409 | 1.339651            | 2.99E-62 | lab   | N                  |

Supplementary Table 11: Selected unique features for model week 32

| Source feature                                                                               | Feature importance | Estimate | Adjusted odds ratio | p-value  | type  | Known associations |
|----------------------------------------------------------------------------------------------|--------------------|----------|---------------------|----------|-------|--------------------|
| <b>SYSTOLIC BLOOD PRESSURE</b>                                                               | 4.65               | 0.60619  | 1.833432            | 4.83E-72 | vital | Y                  |
| <b>pe_hist</b>                                                                               | 2.62               | 2.427387 | 11.32924            | 3.2E-141 | demo  | Y                  |
| <b>gestational hypertension</b>                                                              | 2.46               | 0.058112 | 1.059834            | 0        | dx    | Y                  |
| <b>DIASTOLIC BLOOD PRESSURE</b>                                                              | 1.89               | 0.642766 | 1.901734            | 2.36E-81 | vital | Y                  |
| <b>age_preg</b>                                                                              | 1.89               | 0.007904 | 1.007936            | 0.790512 | demo  | Y                  |
| <b>twin pregnancy</b>                                                                        | 1.64               | 0.018471 | 1.018643            | 3.95E-13 | dx    | N                  |
| <b>FETAL FIBRONECTIN</b>                                                                     | 1.49               | 0.181901 | 1.199496            | 5.52E-17 | lab   | N                  |
| <b>African_American</b>                                                                      | 1.44               | 0.936165 | 2.550182            | 2.63E-47 | demo  | N                  |
| <b>MEAN CORP. HGB</b>                                                                        | 1.38               | -0.16166 | 0.850733            | 1.11E-12 | lab   | N                  |
| <b>Headache; including migraine</b>                                                          | 1.18               | 0.031175 | 1.031666            | 6.64E-62 | dx    | Y                  |
| <b>Other screening for suspected conditions (not mental disorders or infectious disease)</b> | 1.14               | 0.010179 | 1.010231            | 2.06E-16 | dx    | N                  |
| <b>WEIGHT</b>                                                                                | 1.11               | 0.33154  | 1.393112            | 4.11E-68 | vital | Y                  |
| <b>U-PROTEIN</b>                                                                             | 0.88               | 0.561581 | 1.753443            | 1.2E-247 | lab   | Y                  |
| <b>unspecified GDM</b>                                                                       | 0.83               | 0.016284 | 1.016417            | 1.54E-25 | dx    | N                  |
| <b>MEAN PLT VOLUME</b>                                                                       | 0.82               | -0.07591 | 0.926902            | 0.010609 | lab   | N                  |
| <b>FIBRINOGEN</b>                                                                            | 0.81               | 0.527481 | 1.694658            | 0        | lab   | N                  |
| <b>PULSE</b>                                                                                 | 0.81               | -0.05776 | 0.943876            | 0.042852 | vital | N                  |
| <b>URIC ACID-BLD</b>                                                                         | 0.8                | 0.495093 | 1.640651            | 0        | lab   | N                  |
| <b>MEAN CORP. HGB CONC.</b>                                                                  | 0.79               | -0.14499 | 0.865031            | 2.3E-07  | lab   | N                  |
| <b>O2 SATURATION</b>                                                                         | 0.77               | -0.00084 | 0.999157            | 0.977392 | vital | N                  |
| <b>PLATELET</b>                                                                              | 0.77               | 0.87738  | 2.404591            | 0.004874 | lab   | N                  |
| <b>RED DISTRIB. WIDTH</b>                                                                    | 0.76               | 0.056718 | 1.058357            | 0.003923 | lab   | N                  |
| <b>Essential hypertension</b>                                                                | 0.71               | 0.05644  | 1.058063            | 8.3E-147 | dx    | Y                  |
| <b>MEAN CORP. VOLUME</b>                                                                     | 0.67               | -0.13314 | 0.875345            | 9.54E-06 | lab   | N                  |
| <b>PretermL</b>                                                                              | 0.67               | 0.013712 | 1.013807            | 5.51E-29 | dx    | N                  |
| <b>WHITE BLOOD CELL</b>                                                                      | 0.66               | -0.01806 | 0.982104            | 0.534089 | lab   | Y                  |
| <b>MONOCYTE %</b>                                                                            | 0.56               | 0.34719  | 1.415086            | 3.25E-34 | lab   | N                  |
| <b>HEMOGLOBIN</b>                                                                            | 0.56               | -0.04404 | 0.956912            | 0.072439 | lab   | Y                  |
| <b>RESPIRATIONS</b>                                                                          | 0.55               | -0.01313 | 0.98696             | 0.67305  | vital | N                  |
| <b>LYMPHOCYTE %</b>                                                                          | 0.55               | 0.347576 | 1.415631            | 9.78E-36 | lab   | N                  |
| <b>HEMATOCRIT</b>                                                                            | 0.55               | -0.04825 | 0.952894            | 0.092603 | lab   | N                  |
| <b>PH - DIPSTICK</b>                                                                         | 0.54               | -0.12553 | 0.882028            | 1.12E-05 | lab   | N                  |
| <b>EOSINOPHIL %</b>                                                                          | 0.54               | 0.154687 | 1.167293            | 2.86E-14 | lab   | N                  |
| <b>ALK PHOSPHATASE, BLD</b>                                                                  | 0.5                | 0.289199 | 1.335357            | 7.44E-62 | lab   | N                  |

Supplementary Table 12: Selected unique features for model week 34

| Source feature                                                                               | Feature importance | Estimate | Adjusted odds ratio | p-value  | type  | Known associations |
|----------------------------------------------------------------------------------------------|--------------------|----------|---------------------|----------|-------|--------------------|
| <b>SYSTOLIC BLOOD PRESSURE</b>                                                               | 5.3                | 0.653821 | 1.922875            | 1.43E-72 | vital | Y                  |
| gestational hypertension                                                                     | 3.23               | 0.056492 | 1.058118            | 0        | dx    | Y                  |
| pe_hist                                                                                      | 2.51               | 2.420706 | 11.2538             | 1.7E-131 | demo  | Y                  |
| age_preg                                                                                     | 2.34               | 0.008315 | 1.008349            | 0.78699  | demo  | Y                  |
| <b>FIBRINOGEN</b>                                                                            | 1.92               | 0.588711 | 1.801665            | 0        | lab   | N                  |
| <b>DIASTOLIC BLOOD PRESSURE</b>                                                              | 1.71               | 0.555188 | 1.742268            | 4.5E-141 | vital | Y                  |
| <b>WHITE BLOOD CELL</b>                                                                      | 1.65               | 0.111964 | 1.118473            | 4.54E-05 | lab   | Y                  |
| <b>Other pregnancy and delivery including normal</b>                                         | 1.49               | -0.00156 | 0.99844             | 0.221939 | dx    | N                  |
| <b>URIC ACID-BLD</b>                                                                         | 1.44               | 0.548969 | 1.731467            | 0        | lab   | N                  |
| <b>U-PROTEIN</b>                                                                             | 1.34               | 0.609215 | 1.838987            | 2.1E-270 | lab   | Y                  |
| large for GA                                                                                 | 1.33               | 0.010029 | 1.01008             | 4.09E-05 | dx    | N                  |
| <b>Headache; including migraine</b>                                                          | 1.29               | 0.030646 | 1.03112             | 3.7E-61  | dx    | Y                  |
| <b>WEIGHT</b>                                                                                | 1.28               | 0.174777 | 1.190981            | 4.8E-15  | vital | Y                  |
| <b>MEAN CORP. HGB</b>                                                                        | 1.24               | -0.15373 | 0.857506            | 1.51E-10 | lab   | N                  |
| <b>HEMOGLOBIN</b>                                                                            | 1.2                | -0.08934 | 0.914536            | 0.002092 | lab   | Y                  |
| <b>MEAN CORP. VOLUME</b>                                                                     | 1.05               | -0.08684 | 0.916828            | 0.000778 | lab   | N                  |
| twin pregnancy                                                                               | 1.03               | 0.020257 | 1.020463            | 1.27E-15 | dx    | N                  |
| <b>HEMATOCRIT</b>                                                                            | 1                  | 0.010178 | 1.01023             | 0.740753 | lab   | N                  |
| chronic hypertension                                                                         | 0.94               | 0.056093 | 1.057696            | 1.5E-197 | dx    | Y                  |
| African_American                                                                             | 0.9                | 0.934435 | 2.545776            | 4.75E-44 | demo  | N                  |
| <b>PLATELET</b>                                                                              | 0.86               | 4.172745 | 64.89333            | 3.45E-09 | lab   | Y                  |
| fibroids in pregnancy                                                                        | 0.86               | 0.016304 | 1.016437            | 3.42E-08 | dx    | N                  |
| <b>FETAL FIBRONECTIN</b>                                                                     | 0.85               | 0.215031 | 1.239901            | 1.05E-22 | lab   | N                  |
| <b>RED DISTRIB. WIDTH</b>                                                                    | 0.85               | -0.00717 | 0.992859            | 0.812497 | lab   | N                  |
| <b>RESPIRATIONS</b>                                                                          | 0.79               | 0.025386 | 1.025711            | 0.307249 | vital | N                  |
| <b>Other screening for suspected conditions (not mental disorders or infectious disease)</b> | 0.77               | 0.00906  | 1.009101            | 8.12E-13 | dx    | N                  |
| <b>MONOCYTE %</b>                                                                            | 0.75               | 0.393142 | 1.481628            | 5.4E-45  | lab   | N                  |
| <b>PULSE</b>                                                                                 | 0.73               | 0.1139   | 1.12064             | 4.98E-05 | vital | N                  |
| PretermL                                                                                     | 0.71               | 0.013535 | 1.013627            | 1.38E-30 | dx    | N                  |
| <b>MEAN PLT VOLUME</b>                                                                       | 0.67               | 0.142306 | 1.152929            | 3.63E-07 | lab   | N                  |
| <b>GLUCOSE 1 HR</b>                                                                          | 0.66               | 0.312527 | 1.366875            | 1.8E-28  | lab   | N                  |
| <b>ALK PHOSPHATASE, BLD</b>                                                                  | 0.61               | 0.283027 | 1.327141            | 4.29E-65 | lab   | N                  |
| <b>MEAN CORP. HGB CONC.</b>                                                                  | 0.58               | 0.023209 | 1.023481            | 0.447844 | lab   | N                  |
| <b>HEIGHT</b>                                                                                | 0.57               | 0.418862 | 1.52023             | 8.49E-41 | vital | N                  |
| <b>EOSINOPHIL %</b>                                                                          | 0.56               | 0.15872  | 1.17201             | 2.09E-14 | lab   | N                  |
| <b>U-CREATININE (TIMED)</b>                                                                  | 0.55               | 0.332537 | 1.394501            | 2.3E-143 | lab   | N                  |
| Essential hypertension                                                                       | 0.53               | 0.054599 | 1.056117            | 9.5E-147 | dx    | Y                  |
| <b>RBC BLOOD CELL</b>                                                                        | 0.53               | -0.16819 | 0.84519             | 4.11E-09 | lab   | N                  |

Supplementary Table 13: Selected unique features for model week 35

| Source feature                                | Feature importance | Estimate | Adjusted odds ratio | p-value  | type  | Known associations |
|-----------------------------------------------|--------------------|----------|---------------------|----------|-------|--------------------|
| <b>SYSTOLIC BLOOD PRESSURE</b>                | 3.69               | 0.684297 | 1.982377            | 2.19E-72 | vital | Y                  |
| gestational hypertension                      | 2.11               | 0.054435 | 1.055944            | 0        | dx    | Y                  |
| pe_hist                                       | 1.77               | 2.44342  | 11.51234            | 4.3E-130 | demo  | Y                  |
| age_preg                                      | 1.51               | -0.00437 | 0.995637            | 0.889579 | demo  | Y                  |
| <b>FIBRINOGEN</b>                             | 1.47               | 0.631588 | 1.880595            | 0        | lab   | N                  |
| <b>DIASTOLIC BLOOD PRESSURE</b>               | 1.38               | 0.577832 | 1.782171            | 2.3E-148 | vital | Y                  |
| <b>MEAN CORP. VOLUME</b>                      | 1.04               | -0.24674 | 0.781341            | 1.13E-24 | lab   | N                  |
| <b>URIC ACID-BLD</b>                          | 1.02               | 0.580663 | 1.787224            | 0        | lab   | N                  |
| <b>PLATELET</b>                               | 1.01               | -0.03824 | 0.962481            | 0.756975 | lab   | N                  |
| <b>MEAN PLT VOLUME</b>                        | 0.99               | 0.014146 | 1.014246            | 0.65429  | lab   | N                  |
| <b>U-PROTEIN</b>                              | 0.97               | 0.64151  | 1.899347            | 5.5E-284 | lab   | Y                  |
| African_American                              | 0.91               | 0.93502  | 2.547264            | 4.96E-42 | demo  | N                  |
| chronic hypertension                          | 0.85               | 0.054726 | 1.056251            | 4.5E-189 | dx    | Y                  |
| <b>WEIGHT</b>                                 | 0.8                | 0.125164 | 1.133334            | 1.93E-07 | vital | Y                  |
| Headache; including migraine                  | 0.78               | 0.03261  | 1.033147            | 8.31E-75 | dx    | Y                  |
| <b>WHITE BLOOD CELL</b>                       | 0.73               | 0.026192 | 1.026538            | 0.394295 | lab   | Y                  |
| <b>MEAN CORP. HGB</b>                         | 0.69               | -0.09856 | 0.906139            | 0.000864 | lab   | N                  |
| large for GA                                  | 0.65               | 0.010398 | 1.010452            | 1.26E-05 | dx    | N                  |
| fibroids in pregnancy                         | 0.64               | 0.018256 | 1.018423            | 2.05E-10 | dx    | N                  |
| <b>RED DISTRIB. WIDTH</b>                     | 0.64               | 0.072813 | 1.07553             | 0.00257  | lab   | N                  |
| Other ear and sense organ disorders           | 0.62               | 0.024606 | 1.024912            | 5.14E-08 | dx    | N                  |
| <b>MEAN CORP. HGB CONC.</b>                   | 0.58               | -0.00154 | 0.998461            | 0.961018 | lab   | N                  |
| <b>HEMATOCRIT</b>                             | 0.57               | -0.06992 | 0.932471            | 0.020119 | lab   | N                  |
| <b>O2 SATURATION</b>                          | 0.54               | 0.003124 | 1.003129            | 0.898801 | vital | N                  |
| <b>PH - DIPSTICK</b>                          | 0.51               | -0.18519 | 0.830948            | 9.56E-10 | lab   | N                  |
| <b>RBC BLOOD CELL</b>                         | 0.49               | -0.05373 | 0.947691            | 0.065065 | lab   | N                  |
| Other pregnancy and delivery including normal | 0.49               | -0.00217 | 0.997834            | 0.110438 | dx    | N                  |
| in vitro fertilization                        | 0.49               | 0.024409 | 1.024709            | 4.24E-13 | dx    | N                  |
| Caucasian                                     | 0.46               | -0.66319 | 0.515206            | 3.35E-25 | demo  | N                  |
| <b>EOSINOPHIL %</b>                           | 0.44               | 0.163849 | 1.178036            | 5.79E-15 | lab   | N                  |
| <b>HEMOGLOBIN</b>                             | 0.41               | 0.018711 | 1.018887            | 0.52783  | lab   | Y                  |
| obesity In pregnancy                          | 0.39               | 0.030777 | 1.031256            | 8.41E-52 | dx    | Y                  |
| Residual codes; unclassified                  | 0.39               | 0.010444 | 1.010499            | 1.54E-19 | dx    | N                  |
| <b>LYMPHOCYTE %</b>                           | 0.38               | 0.416495 | 1.516636            | 4.2E-47  | lab   | N                  |
| <b>RESPIRATIONS</b>                           | 0.38               | 0.006189 | 1.006209            | 0.833065 | vital | N                  |
| <b>PULSE</b>                                  | 0.38               | 0.026296 | 1.026645            | 0.400374 | vital | N                  |
| <b>ALT(SGPT)</b>                              | 0.37               | 0.15643  | 1.169329            | 8.29E-10 | lab   | N                  |
| <b>SPEC GRAVITY-DIPSTICK</b>                  | 0.35               | -0.02679 | 0.973568            | 0.892581 | lab   | N                  |
| <b>MONOCYTE #</b>                             | 0.34               | 0.433823 | 1.543145            | 4.59E-53 | lab   | N                  |

Supplementary Table 14: Selected unique features for model week 36

| Source feature                                                                               | Feature importance | Estimate | Adjusted odds ratio | p-value  | type  | Known associations |
|----------------------------------------------------------------------------------------------|--------------------|----------|---------------------|----------|-------|--------------------|
| <b>SYSTOLIC BLOOD PRESSURE</b>                                                               | 3.29               | 0.72831  | 2.071576            | 3.44E-71 | vital | Y                  |
| gestational hypertension                                                                     | 2.34               | 0.053564 | 1.055024            | 0        | dx    | Y                  |
| <b>U-PROTEIN</b>                                                                             | 2.13               | 0.683811 | 1.981414            | 2.9E-298 | lab   | Y                  |
| <b>DIASTOLIC BLOOD PRESSURE</b>                                                              | 2.11               | 0.544372 | 1.723526            | 1.2E-122 | vital | Y                  |
| pe_hist                                                                                      | 1.83               | 2.452551 | 11.61795            | 2.9E-121 | demo  | Y                  |
| age_preg                                                                                     | 1.75               | -0.02762 | 0.972756            | 0.400237 | demo  | Y                  |
| <b>FIBRINOGEN</b>                                                                            | 1.7                | 0.671959 | 1.95807             | 0        | lab   | N                  |
| chronic hypertension                                                                         | 1.57               | 0.054727 | 1.056253            | 9.6E-191 | dx    | Y                  |
| <b>Other pregnancy and delivery including normal</b>                                         | 1.51               | -0.00483 | 0.995183            | 0.000855 | dx    | N                  |
| PULSE                                                                                        | 1.42               | 0.239107 | 1.270114            | 5.27E-18 | vital | N                  |
| <b>URIC ACID-BLD</b>                                                                         | 1.4                | 0.6104   | 1.841167            | 0        | lab   | N                  |
| <b>WEIGHT</b>                                                                                | 1.28               | 0.326035 | 1.385464            | 2.75E-54 | vital | Y                  |
| <b>PLATELET</b>                                                                              | 0.91               | 7.674223 | 2152.151            | 2.12E-16 | lab   | N                  |
| <b>Other ear and sense organ disorders</b>                                                   | 0.81               | 0.02456  | 1.024865            | 1.87E-07 | dx    | N                  |
| RESPIRATIONS                                                                                 | 0.78               | -0.03537 | 0.965248            | 0.17836  | vital | N                  |
| <b>MEAN PLT VOLUME</b>                                                                       | 0.76               | 0.676362 | 1.96671             | 5.88E-67 | lab   | N                  |
| <b>EOSINOPHIL %</b>                                                                          | 0.74               | 0.165792 | 1.180327            | 1.75E-14 | lab   | N                  |
| <b>MEAN CORP. HGB</b>                                                                        | 0.74               | -0.07098 | 0.931483            | 0.018216 | lab   | N                  |
| Abdominal pain                                                                               | 0.67               | 0.011784 | 1.011853            | 1.36E-12 | dx    | N                  |
| Headache; including migraine                                                                 | 0.67               | 0.031655 | 1.032161            | 4.8E-67  | dx    | Y                  |
| Residual codes; unclassified                                                                 | 0.65               | 0.010121 | 1.010172            | 2.22E-17 | dx    | N                  |
| O2 SATURATION                                                                                | 0.65               | -0.00594 | 0.994077            | 0.878103 | vital | N                  |
| <b>WHITE BLOOD CELL</b>                                                                      | 0.65               | 0.134475 | 1.143936            | 8.68E-06 | lab   | Y                  |
| <b>TEMPERATURE</b>                                                                           | 0.64               | -0.03578 | 0.964851            | 0.249146 | vital | N                  |
| <b>RED DISTRIB. WIDTH</b>                                                                    | 0.62               | -0.03069 | 0.969772            | 0.33706  | lab   | N                  |
| <b>HEMATOCRIT</b>                                                                            | 0.62               | 0.038145 | 1.038882            | 0.243547 | lab   | N                  |
| <b>MEAN CORP. VOLUME</b>                                                                     | 0.62               | 0.642798 | 1.901794            | 7.13E-58 | lab   | N                  |
| <b>RBC BLOOD CELL</b>                                                                        | 0.6                | -0.04311 | 0.957802            | 0.188481 | lab   | N                  |
| <b>ALK PHOSPHATASE, BLD</b>                                                                  | 0.6                | 0.308066 | 1.36079             | 2.31E-72 | lab   | N                  |
| <b>MEAN CORP. HGB CONC.</b>                                                                  | 0.59               | -0.05921 | 0.942505            | 0.067575 | lab   | N                  |
| <b>HEMOGLOBIN</b>                                                                            | 0.58               | -0.06242 | 0.939488            | 0.039214 | lab   | Y                  |
| fibroids in pregnancy                                                                        | 0.55               | 0.018031 | 1.018195            | 1.87E-09 | dx    | N                  |
| <b>Administrative/social admission</b>                                                       | 0.55               | 0.01568  | 1.015803            | 3.51E-33 | dx    | N                  |
| Hispanic                                                                                     | 0.54               | 0.401334 | 1.493817            | 2.38E-07 | demo  | N                  |
| twin pregnancy                                                                               | 0.52               | 0.015845 | 1.015971            | 2.59E-06 | dx    | N                  |
| Benign neoplasm of uterus                                                                    | 0.5                | 0.020208 | 1.020414            | 1.31E-10 | dx    | N                  |
| <b>Other screening for suspected conditions (not mental disorders or infectious disease)</b> | 0.5                | 0.010497 | 1.010552            | 8.35E-15 | dx    | N                  |
| ALT(SGPT)                                                                                    | 0.49               | 0.220039 | 1.246125            | 9.43E-14 | lab   | N                  |
| large for GA                                                                                 | 0.48               | 0.008952 | 1.008992            | 0.000193 | dx    | N                  |
| advanced maternal age                                                                        | 0.48               | 0.005319 | 1.005333            | 0.00114  | dx    | Y                  |

Supplementary Table 15: Selected unique features for model week 37

| Source feature                                                                               | Feature importance | Estimate | Adjusted odds ratio | p-value  | type  | Known associations |
|----------------------------------------------------------------------------------------------|--------------------|----------|---------------------|----------|-------|--------------------|
| <b>SYSTOLIC BLOOD PRESSURE</b>                                                               | 3.73               | 0.666797 | 1.947989            | 9.73E-50 | vital | Y                  |
| <b>Other pregnancy and delivery including normal</b>                                         | 2.58               | -0.00514 | 0.994869            | 0.002743 | dx    | N                  |
| pe_hist                                                                                      | 1.88               | 2.468928 | 11.80978            | 2.34E-97 | demo  | Y                  |
| <b>U-PROTEIN</b>                                                                             | 1.73               | 0.660369 | 1.935506            | 1.3E-226 | lab   | Y                  |
| age_preg                                                                                     | 1.62               | -0.05363 | 0.947787            | 0.150268 | demo  | Y                  |
| <b>URIC ACID-BLD</b>                                                                         | 1.51               | 0.601714 | 1.825245            | 0        | lab   | N                  |
| <b>WEIGHT</b>                                                                                | 1.47               | 0.053937 | 1.055418            | 0.054358 | vital | Y                  |
| <b>FIBRINOGEN</b>                                                                            | 1.42               | 0.660258 | 1.935292            | 0        | lab   | N                  |
| Headache; including migraine                                                                 | 1.02               | 0.031491 | 1.031992            | 2.25E-54 | dx    | Y                  |
| <b>DIASTOLIC BLOOD PRESSURE</b>                                                              | 0.96               | 0.464239 | 1.590803            | 1.85E-67 | vital | Y                  |
| chronic hypertension                                                                         | 0.95               | 0.053067 | 1.0545              | 2.3E-143 | dx    | Y                  |
| <b>PULSE</b>                                                                                 | 0.89               | -0.07208 | 0.93046             | 0.042221 | vital | N                  |
| <b>PLATELET</b>                                                                              | 0.83               | -0.01236 | 0.987716            | 0.526013 | lab   | N                  |
| gestational hypertension                                                                     | 0.76               | 0.049682 | 1.050936            | 3.1E-239 | dx    | Y                  |
| Abdominal pain                                                                               | 0.75               | 0.011436 | 1.011502            | 1.35E-09 | dx    | N                  |
| advanced maternal age                                                                        | 0.71               | 0.00313  | 1.003135            | 0.102355 | dx    | Y                  |
| <b>MEAN CORP. HGB</b>                                                                        | 0.7                | -0.05766 | 0.943969            | 0.101504 | lab   | N                  |
| <b>WHITE BLOOD CELL</b>                                                                      | 0.69               | 0.028661 | 1.029075            | 0.400537 | lab   | Y                  |
| RESPIRATIONS                                                                                 | 0.69               | 0.005019 | 1.005032            | 0.891336 | vital | N                  |
| MONOCYTE %                                                                                   | 0.69               | 0.399477 | 1.491045            | 5.29E-29 | lab   | N                  |
| <b>MEAN PLT VOLUME</b>                                                                       | 0.67               | 0.668525 | 1.951358            | 2.75E-51 | lab   | N                  |
| <b>RED DISTRIB. WIDTH</b>                                                                    | 0.63               | -0.02714 | 0.973228            | 0.455204 | lab   | N                  |
| intrauterine fetal demise                                                                    | 0.62               | 0.016151 | 1.016282            | 1.01E-33 | dx    | N                  |
| obesity In pregnancy                                                                         | 0.61               | 0.029116 | 1.029544            | 3.26E-33 | dx    | Y                  |
| <b>MEAN CORP. HGB CONC.</b>                                                                  | 0.6                | -0.16615 | 0.846915            | 9.33E-07 | lab   | N                  |
| EOSINOPHIL %                                                                                 | 0.57               | 0.151728 | 1.163843            | 9.44E-10 | lab   | N                  |
| PH - DIPSTICK                                                                                | 0.56               | 0.032889 | 1.033436            | 0.379646 | lab   | N                  |
| <b>TEMPERATURE</b>                                                                           | 0.56               | 0.555667 | 1.743103            | 3.13E-54 | vital | N                  |
| <b>MEAN CORP. VOLUME</b>                                                                     | 0.53               | 0.065907 | 1.068128            | 0.092707 | lab   | N                  |
| <b>HEMATOCRIT</b>                                                                            | 0.52               | -0.0418  | 0.959065            | 0.259214 | lab   | N                  |
| Hispanic                                                                                     | 0.51               | 0.457163 | 1.579586            | 1.64E-07 | demo  | N                  |
| <b>HEMOGLOBIN</b>                                                                            | 0.51               | -0.02217 | 0.978077            | 0.560193 | lab   | Y                  |
| <b>HEIGHT</b>                                                                                | 0.51               | 0.425388 | 1.530184            | 1.93E-28 | vital | N                  |
| <b>RBC BLOOD CELL</b>                                                                        | 0.48               | 0.212174 | 1.236363            | 1.86E-11 | lab   | N                  |
| <b>Other screening for suspected conditions (not mental disorders or infectious disease)</b> | 0.47               | 0.00997  | 1.01002             | 6.99E-11 | dx    | N                  |
| <b>ALT(SGPT)</b>                                                                             | 0.45               | 0.262853 | 1.300635            | 4.05E-36 | lab   | N                  |
| <b>Residual codes; unclassified</b>                                                          | 0.45               | 0.007821 | 1.007851            | 8.66E-09 | dx    | N                  |

Supplementary Table 16: Selected unique features for model week 38

| Source feature                                | Feature importance | Estimate | Adjusted odds ratio | p-value  | type  | Known associations |
|-----------------------------------------------|--------------------|----------|---------------------|----------|-------|--------------------|
| <b>SYSTOLIC BLOOD PRESSURE</b>                | 1.77               | 0.708632 | 2.031211            | 5.54E-42 | vital | Y                  |
| Other pregnancy and delivery including normal | 1.46               | -0.00553 | 0.994489            | 0.006918 | dx    | N                  |
| <b>WEIGHT</b>                                 | 1.39               | 0.591225 | 1.806199            | 5.63E-42 | vital | Y                  |
| pe_hist                                       | 1.13               | 2.397544 | 10.99614            | 1.54E-64 | demo  | Y                  |
| Headache; including migraine                  | 1.07               | 0.033321 | 1.033883            | 5.78E-53 | dx    | Y                  |
| age_preg                                      | 1.06               | -0.08337 | 0.920008            | 0.052113 | demo  | Y                  |
| <b>URIC ACID-BLD</b>                          | 1.02               | 0.59756  | 1.817678            | 4.4E-251 | lab   | N                  |
| <b>FIBRINOGEN</b>                             | 0.88               | 0.656714 | 1.928445            | 2.6E-265 | lab   | N                  |
| <b>PLATELET</b>                               | 0.78               | -0.01152 | 0.988546            | 0.898893 | lab   | N                  |
| <b>TEMPERATURE</b>                            | 0.76               | 0.545392 | 1.725285            | 6.68E-40 | vital | N                  |
| <b>MEAN CORP. HGB CONC.</b>                   | 0.73               | -0.11111 | 0.894841            | 0.007002 | lab   | N                  |
| obesity In pregnancy                          | 0.71               | 0.029139 | 1.029568            | 4.56E-26 | dx    | Y                  |
| <b>DIASTOLIC BLOOD PRESSURE</b>               | 0.69               | 0.440462 | 1.553425            | 2.73E-41 | vital | Y                  |
| <b>RESPIRATIONS</b>                           | 0.68               | 0.040801 | 1.041645            | 0.180907 | vital | N                  |
| <b>HEMATOCRIT</b>                             | 0.68               | -0.08239 | 0.920917            | 0.005788 | lab   | N                  |
| <b>MEAN CORP. HGB</b>                         | 0.67               | -0.20279 | 0.81645             | 4.14E-09 | lab   | N                  |
| <b>MEAN PLT VOLUME</b>                        | 0.64               | 0.684791 | 1.983358            | 1.77E-40 | lab   | N                  |
| <b>U-PROTEIN</b>                              | 0.62               | 0.644881 | 1.90576             | 5.1E-164 | lab   | Y                  |
| Other circulatory disease                     | 0.58               | 0.042533 | 1.043451            | 1.83E-71 | dx    | N                  |
| intrauterine fetal demise                     | 0.57               | 0.016831 | 1.016973            | 1.62E-28 | dx    | N                  |
| Hispanic                                      | 0.53               | 0.417013 | 1.517423            | 4.31E-05 | demo  | N                  |
| nonreassuring fetal status                    | 0.51               | 0.003795 | 1.003802            | 0.028266 | dx    | N                  |
| Benign neoplasm of uterus                     | 0.51               | 0.021257 | 1.021484            | 1.45E-07 | dx    | N                  |
| Allergic reactions                            | 0.47               | 0.017642 | 1.017799            | 1.61E-22 | dx    | N                  |
| <b>MONOCYTE %</b>                             | 0.47               | 0.445079 | 1.560613            | 3.49E-31 | lab   | N                  |
| <b>SPEC GRAVITY-DIPSTICK</b>                  | 0.46               | 0.008159 | 1.008193            | 0.779043 | lab   | N                  |
| <b>RBC BLOOD CELL</b>                         | 0.46               | 0.058162 | 1.059887            | 0.176843 | lab   | N                  |
| Residual codes; unclassified                  | 0.45               | 0.009113 | 1.009155            | 3.07E-09 | dx    | N                  |
| Abdominal pain                                | 0.44               | 0.010506 | 1.010562            | 1.77E-06 | dx    | N                  |
| <b>ALK PHOSPHATASE, BLD</b>                   | 0.44               | 0.331939 | 1.393667            | 9.61E-50 | lab   | N                  |
| <b>PULSE</b>                                  | 0.42               | -0.03886 | 0.961882            | 0.370665 | vital | N                  |
| <b>WHITE BLOOD CELL</b>                       | 0.42               | 0.101528 | 1.106861            | 0.007926 | lab   | Y                  |
| fibroids in pregnancy                         | 0.42               | 0.018757 | 1.018934            | 1.57E-06 | dx    | N                  |
| <b>GTT 3 HOUR</b>                             | 0.41               | 0.154483 | 1.167054            | 1.92E-06 | lab   | N                  |
| <b>HEIGHT</b>                                 | 0.41               | 0.424744 | 1.5292              | 1.02E-21 | vital | N                  |

Supplementary Table 17: Selected unique features for model week 39

| Source feature                                                                        | Feature importance | Estimate     | Adjusted odds ratio | p-value     | type  | Known associations |
|---------------------------------------------------------------------------------------|--------------------|--------------|---------------------|-------------|-------|--------------------|
| age_preg                                                                              | 10.53              | -0.11124987  | 0.894715159         | 0.04448106  | demo  | Y                  |
| Other pregnancy and delivery including normal                                         | 9.55               | -0.004001481 | 0.996006514         | 0.153396547 | dx    | N                  |
| intrauterine fetal demise                                                             | 3.17               | 0.015588482  | 1.015710617         | 1.14008E-15 | dx    | N                  |
| Residual codes; unclassified                                                          | 3.16               | 0.008988653  | 1.009029173         | 5.38562E-06 | dx    | N                  |
| Other screening for suspected conditions (not mental disorders or infectious disease) | 2.97               | 0.010421225  | 1.010475715         | 3.13878E-06 | dx    | N                  |
| <b>SYSTOLIC BLOOD PRESSURE</b>                                                        | 2.59               | 0.761641504  | 2.141789091         | 2.61591E-29 | vital | Y                  |
| Headache; including migraine                                                          | 2.39               | 0.038011568  | 1.038743249         | 2.02811E-51 | dx    | Y                  |
| <b>DIASTOLIC BLOOD PRESSURE</b>                                                       | 2.26               | -0.164154023 | 0.848611306         | 0.001691062 | vital | Y                  |
| <b>FIBRINOGEN</b>                                                                     | 2.26               | 0.668933134  | 1.952153523         | 2.0781E-174 | lab   | N                  |
| <b>TEMPERATURE</b>                                                                    | 1.91               | 0.620172957  | 1.859249584         | 9.26509E-32 | vital | N                  |
| <b>WEIGHT</b>                                                                         | 1.78               | 0.626795642  | 1.871603673         | 3.18649E-29 | vital | Y                  |
| pe_hist                                                                               | 1.69               | 2.328142598  | 10.25886898         | 5.99289E-33 | demo  | Y                  |
| Caucasian                                                                             | 1.65               | -0.695580641 | 0.498784749         | 7.41951E-10 | demo  | N                  |
| nonreassuring fetal status                                                            | 1.64               | 0.001503977  | 1.001505109         | 0.522886695 | dx    | N                  |
| <b>PULSE</b>                                                                          | 1.56               | -0.08296264  | 0.920385532         | 0.124683631 | vital | N                  |
| <b>MEAN PLT VOLUME</b>                                                                | 1.48               | 0.068216109  | 1.070596649         | 0.200320819 | lab   | N                  |
| high risk pregnancy                                                                   | 1.45               | 0.017521674  | 1.017676079         | 1.73223E-17 | dx    | N                  |
| <b>MEAN CORP. HGB</b>                                                                 | 1.34               | -0.050990629 | 0.950287575         | 0.330304422 | lab   | N                  |
| <b>MEAN CORP. VOLUME</b>                                                              | 1.3                | -0.093044334 | 0.911153104         | 0.0532552   | lab   | N                  |
| <b>U-PROTEIN</b>                                                                      | 1.27               | 0.638368735  | 1.893389739         | 2.0134E-103 | lab   | Y                  |
| Other circulatory disease                                                             | 1.26               | 0.042058453  | 1.042955441         | 1.07653E-43 | dx    | N                  |
| <b>RED DISTRIB. WIDTH</b>                                                             | 1.25               | 0.069658883  | 1.072142393         | 0.099684345 | lab   | N                  |
| <b>WHITE BLOOD CELL</b>                                                               | 1.23               | 0.190048181  | 1.209307861         | 3.14863E-05 | lab   | Y                  |
| Allergic reactions                                                                    | 1.22               | 0.018829603  | 1.019007998         | 4.41412E-18 | dx    | N                  |
| <b>AST (SGOT)</b>                                                                     | 1.19               | 0.297207029  | 1.346093951         | 2.06114E-32 | lab   | N                  |
| <b>URIC ACID-BLD</b>                                                                  | 1.15               | 0.595776927  | 1.814440085         | 1.1016E-159 | lab   | N                  |
| <b>MEAN CORP. HGB CONC.</b>                                                           | 1.14               | -0.037068034 | 0.963610575         | 0.506923008 | lab   | N                  |
| <b>RESPIRATIONS</b>                                                                   | 1.1                | 0.068104436  | 1.070477099         | 0.038099008 | vital | N                  |
| advanced maternal age                                                                 | 1.06               | 0.002144445  | 1.002146746         | 0.475452172 | dx    | Y                  |
| Administrative/social admission                                                       | 1.04               | 0.016252014  | 1.016384796         | 8.13165E-14 | dx    | N                  |
| <b>HEIGHT</b>                                                                         | 1.02               | 0.436859851  | 1.547839134         | 8.91864E-15 | vital | N                  |
| fibroids in pregnancy                                                                 | 1.01               | 0.018673628  | 1.01884907          | 0.000240715 | dx    | N                  |
| <b>PLATELET</b>                                                                       | 0.88               | -0.014015647 | 0.986082115         | 0.746480153 | lab   | N                  |
| Asian                                                                                 | 0.85               | -0.707109076 | 0.49306756          | 0.016542086 | demo  | N                  |
| <b>ALT(SGPT)</b>                                                                      | 0.84               | 0.082703322  | 1.086219504         | 1.43744E-05 | lab   | N                  |
| gestational hypertension                                                              | 0.82               | 0.043186052  | 1.04413214          | 3.37455E-74 | dx    | Y                  |
| <b>PH - DIPSTICK</b>                                                                  | 0.82               | 0.110267793  | 1.116577042         | 0.041730474 | lab   | N                  |
| <b>O2 SATURATION</b>                                                                  | 0.8                | -0.048512005 | 0.952645902         | 0.723358835 | vital | N                  |



Supplementary Table 18: Selected unique features for model intrapartum

| Source feature                                | Feature importance | Estimate     | Adjusted odds ratio | p_value    | type  | Known associations |
|-----------------------------------------------|--------------------|--------------|---------------------|------------|-------|--------------------|
| Caucasian                                     | 0.150207522        | -0.612958772 | 0.541745594         | 6.54E-20   | demo  | N                  |
| Oxytocin                                      | 0.129205972        | -0.011858392 | 0.988211642         | 5.22E-08   | rx    | N                  |
| nonreassuring fetal status                    | 0.082771879        | -0.011251526 | 0.985542198         | 4.97E-11   | dx    | N                  |
| Ketorolac                                     | 0.062647465        | -0.010467449 | 0.989587144         | 1.19E-06   | rx    | N                  |
| Sodium Chloride                               | 0.06007251         | -0.0067654   | 0.993257434         | 7.28E-06   | rx    | N                  |
| Other screening for suspected conditions      | 0.055253646        | 0.003910787  | 1.003615684         | 7.10E-06   | dx    | N                  |
| Umbilical cord complication                   | 0.053902303        | -0.009419243 | 0.985748419         | 1.06E-05   | dx    | N                  |
| Headache; including migraine                  | 0.052181989        | 0.010596059  | 1.011519438         | 1.23E-16   | dx    | Y                  |
| Administrative/social admission               | 0.052019326        | 0.002447276  | 1.002543078         | 0.00705448 | dx    | N                  |
| age_preg                                      | 0.048287746        | 0.012246597  | 1.012321893         | 0.00126216 | demo  | Y                  |
| Prolonged pregnancy                           | 0.04687838         | -0.007938494 | 0.990637602         | 1.99E-12   | dx    | N                  |
| twin pregnancy                                | 0.044835397        | 0.021500891  | 1.022383438         | 2.89E-48   | dx    | N                  |
| medicaid                                      | 0.043045196        | 0.190894935  | 1.210332282         | 0.00024241 | demo  | N                  |
| African-American/Black                        | 0.037403528        | 0.24701167   | 1.280194052         | 0.00035221 | demo  | N                  |
| Previous C-section                            | 0.037216406        | -0.932613859 | 0.441434903         | 5.67E-28   | dx    | N                  |
| SYSTOLIC BLOOD PRESSURE                       | 0.033329919        | 0.015291335  | 1.015626565         | 0.00076121 | vital | Y                  |
| MONOCYTE %                                    | 0.032845862        | -0.034062866 | 0.966510742         | 0.00252293 | lab   | N                  |
| gestational hypertension                      | 0.031669927        | 0.703492293  | 2.016552473         | 1.55E-07   | dx    | Y                  |
| DIASTOLIC BLOOD PRESSURE                      | 0.025997681        | 0.023066886  | 1.023745812         | 9.55E-13   | vital | Y                  |
| Malposition; malpresentation                  | 0.018668199        | -0.009098115 | 0.991244364         | 8.61E-08   | dx    | N                  |
| unspecified PROM                              | 0.016509628        | -0.010849348 | 0.988297504         | 1.49E-05   | dx    | N                  |
| Preterm Labor                                 | 0.015716832        | -0.002032654 | 0.998828785         | 0.00341067 | dx    | N                  |
| MEAN PLT VOLUME                               | 0.01522858         | 0.04512906   | 1.048222006         | 0.00046327 | lab   | N                  |
| ANTIBODY SCREEN                               | 0.014878611        | -0.15267071  | 0.858412342         | 0.00767626 | lab   | N                  |
| Other pregnancy and delivery including normal | 0.013185698        | -0.003935741 | 0.995952399         | 0.00036824 | dx    | N                  |
| PULSE                                         | 0.012647335        | 0.002999201  | 1.003012165         | 0.00205978 | vital | N                  |
| Medical examination/evaluation                | 0.010648062        | -0.006882199 | 0.99433121          | 2.66E-08   | dx    | N                  |
| WEIGHT                                        | 0.010487855        | 0.005728262  | 1.005758985         | 1.33E-08   | vital | Y                  |
| Other circulatory disease                     | 0.009448987        | 0.011407608  | 1.011614373         | 2.91E-13   | dx    | N                  |
| Preterm Labor with Preterm Delivery           | 0.007188055        | -0.012197647 | 0.988094143         | 3.28E-05   | dx    | N                  |
| HEMOGLOBIN                                    | 0.007144324        | -0.073692059 | 0.928957714         | 2.80E-06   | lab   | Y                  |
| RED DISTRIB. WIDTH                            | 0.006676338        | 0.022825689  | 1.023314838         | 0.00129041 | lab   | N                  |
| MEAN CORP. HGB CONC                           | 0.006121853        | -0.044000029 | 0.958026098         | 0.00273486 | lab   | N                  |
| WHITE BLOOD CELL                              | 0.005914148        | 0.004915298  | 1.004963856         | 0.00197973 | lab   | Y                  |
| obesity                                       | 0.005743344        | 0.009380888  | 1.009753816         | 8.77E-08   | dx    | Y                  |
| HCT                                           | 0.005470189        | -0.001914319 | 0.998240088         | 0.00134388 | lab   | N                  |
| chronic hypertension                          | 0.005381996        | 0.00845751   | 1.00873357          | 2.31E-06   | dx    | Y                  |
| MEAN CORP. VOLUME                             | 0.005217996        | -0.007945377 | 0.992114114         | 4.77E-05   | lab   | N                  |
| RBC                                           | 0.004854966        | 0.100828574  | 1.110239501         | 0.00025417 | lab   | N                  |
| nonspecific fetal complication                | 0.00394182         | 0.003178472  | 1.003463003         | 5.64E-05   | dx    | N                  |
| PLATELET                                      | 0.003940515        | -0.007869401 | 0.993626989         | 0.00473409 | lab   | N                  |
| Coagulation and hemorrhagic disorders         | 0.003582716        | 0.006156422  | 1.006716909         | 0.00023949 | dx    | N                  |
| placenta_previa                               | 0.003204361        | -0.007139863 | 0.992814055         | 0.00136125 | dx    | N                  |
| MEAN CORP. HGB                                | 0.003196592        | -0.018455737 | 0.981936044         | 0.00094464 | lab   | N                  |
| anemia in pregnancy                           | 0.003063244        | -0.005399402 | 0.994080684         | 0.00011376 | dx    | N                  |
| gbs infection                                 | 0.002883183        | -0.006020683 | 0.993672105         | 0.00292173 | dx    | N                  |
| Hispanic                                      | 0.002823367        | -0.096039099 | 0.908428496         | 0.17206322 | demo  | N                  |
| first_drink_impact_day                        | 0.002415315        | 0.119240824  | 1.126641208         | 0.00413774 | demo  | N                  |

**Supplementary Table 18: Selected unique features for model intrapartum (continued)**

| Source feature                                                                                                                                                                                            | Feature importance | Estimate     | Adjusted odds ratio | p_value    | type | Known associations |
|-----------------------------------------------------------------------------------------------------------------------------------------------------------------------------------------------------------|--------------------|--------------|---------------------|------------|------|--------------------|
| Acetaminophen                                                                                                                                                                                             | 0.002231738        | 0.006407242  | 1.006427812         | 1.10E-11   | rx   | N                  |
| oligohydramnios                                                                                                                                                                                           | 0.002125025        | -0.008065892 | 0.991675763         | 0.0038694  | dx   | N                  |
| Asian                                                                                                                                                                                                     | 0.001544958        | -0.527018632 | 0.590362436         | 1.77E-08   | demo | N                  |
| renal complications in pregnancy                                                                                                                                                                          | 0.001482591        | 0.008358099  | 1.008117008         | 0.00104707 | dx   | N                  |
| Postpartum diagnosis                                                                                                                                                                                      | 0.0012415          | -0.024619059 | 0.975461955         | 0.00153584 | dx   | N                  |
| Essential hypertension                                                                                                                                                                                    | 0.001020357        | 0.006664701  | 1.007944736         | 0.00105849 | dx   | Y                  |
| pe_hist                                                                                                                                                                                                   | 0.000660588        | 1.086209176  | 2.963020466         | 3.08E-09   | demo | Y                  |
| Labetalol                                                                                                                                                                                                 | 0.000504375        | 0.038119603  | 1.038855475         | 1.82E-40   | rx   | N                  |
| delivery_failed induction of labor                                                                                                                                                                        | 0                  | -0.011060667 | 0.99600403          | 0.00720967 | dx   | N                  |
| pregestational type 1 DM                                                                                                                                                                                  | 0                  | 0.019578839  | 1.023268976         | 0.00265496 | dx   | N                  |
| miscarriage                                                                                                                                                                                               | 0                  | 0.031337137  | 1.031833315         | 0.83061889 | demo | N                  |
| CASE ABORTED                                                                                                                                                                                              | 0                  | 0.061336028  | 1.063256138         | 0.0148516  | proc | N                  |
| Acute bronchitis                                                                                                                                                                                          | 0                  | 0.019643993  | 1.01719014          | 0.00313406 | dx   | N                  |
| Ligation or transection of fallopian tube(s) when done at the time of cesarean delivery or intra-abdominal surgery (not a separate procedure) (List separately in addition to code for primary procedure) | 0                  | -0.014728689 | 0.985379248         | 0.01244612 | proc | N                  |
| headache                                                                                                                                                                                                  | 0                  | 0.014726792  | 1.010664709         | 0.00504439 | dx   | Y                  |
| in vitro fertilization                                                                                                                                                                                    | 0                  | 0.006870006  | 1.005935432         | 0.00569769 | dx   | N                  |
| Complications of surgical procedures or medical care                                                                                                                                                      | 0                  | 0.008629529  | 1.008944915         | 0.00746718 | dx   | N                  |
| recurrent pregnancy loss                                                                                                                                                                                  | 0                  | 0.010096693  | 1.009445444         | 0.00543719 | dx   | N                  |
| first_smk_impact_day                                                                                                                                                                                      | 0                  | 0.185427649  | 1.203733105         | 0.00315571 | demo | N                  |
| delivery_hematoma                                                                                                                                                                                         | 0                  | 0.032491191  | 1.029803666         | 0.00624365 | dx   | N                  |

Supplementary Table 19: Selected unique features for model postpartum

| Source feature                                                                                                              | Feature importance | Estimate     | Adjusted odds ratio | p_value     | type  | Known associations |
|-----------------------------------------------------------------------------------------------------------------------------|--------------------|--------------|---------------------|-------------|-------|--------------------|
| Ibuprofen                                                                                                                   | 0.364716606        | -0.01296254  | 0.987121112         | 1.04E-30    | rx    | N                  |
| Caucasian                                                                                                                   | 0.240070946        | -0.397921519 | 0.671714743         | 0.022826759 | demo  | N                  |
| OB-related trauma to perineum and vulva                                                                                     | 0.213517372        | -0.013542605 | 0.985265174         | 3.97E-21    | dx    | N                  |
| age_preg                                                                                                                    | 0.17398007         | 0.038154054  | 1.038891266         | 4.30E-05    | demo  | Y                  |
| Other aftercare                                                                                                             | 0.154464294        | -0.01818284  | 0.981693531         | 2.45E-15    | dx    | N                  |
| Administrative/social admission                                                                                             | 0.137355629        | 0.005672244  | 1.007675073         | 0.001819962 | dx    | N                  |
| Contraceptive and procreative management                                                                                    | 0.128979895        | -0.009443669 | 0.990932444         | 8.88E-07    | dx    | N                  |
| Umbilical cord complication                                                                                                 | 0.104475754        | -0.005182352 | 0.994909965         | 0.0002134   | dx    | N                  |
| gestational hypertension                                                                                                    | 0.101781649        | 0.018124124  | 1.018196444         | 1.90E-28    | dx    | Y                  |
| African-American/Black                                                                                                      | 0.099505476        | 0.850423852  | 2.340638725         | 8.31E-07    | demo  | N                  |
| Immunizations and screening for infectious diseases                                                                         | 0.087812433        | -0.006912188 | 0.993499583         | 3.02E-06    | dx    | N                  |
| SYSTOLIC BLOOD PRESSURE                                                                                                     | 0.06972831         | 0.017756126  | 1.01830803          | 0.001350675 | vital | Y                  |
| PULSE                                                                                                                       | 0.059997127        | 0.010106951  | 1.010203362         | 0.001135782 | vital | N                  |
| Medical examination/evaluation                                                                                              | 0.059511343        | -0.00557685  | 0.99311459          | 0.006598619 | dx    | N                  |
| Headache; including migraine                                                                                                | 0.0583503          | 0.006450628  | 1.008291684         | 0.00545399  | dx    | Y                  |
| DIASTOLIC BLOOD PRESSURE                                                                                                    | 0.054403084        | 0.01945539   | 1.020098368         | 0.000130308 | vital | Y                  |
| MEAN CORP. VOLUME                                                                                                           | 0.053784586        | -0.008597857 | 0.99146911          | 0.007918128 | lab   | N                  |
| WHITE BLOOD CELL                                                                                                            | 0.046290387        | -0.000641479 | 0.999447766         | 0.003521754 | lab   | Y                  |
| TEMPERATURE                                                                                                                 | 0.045716487        | 0.219254459  | 1.29755792          | 0.001654393 | vital | N                  |
| unspecified fluid disorder                                                                                                  | 0.042850071        | -0.010161876 | 0.990712458         | 0.000346916 | dx    | N                  |
| Allergic reactions                                                                                                          | 0.040199987        | -0.005135422 | 0.994413624         | 0.000179517 | dx    | N                  |
| HCT                                                                                                                         | 0.039177449        | -0.026837951 | 0.973623319         | 0.003051283 | lab   | N                  |
| HEMOGLOBIN                                                                                                                  | 0.033595806        | -0.088121674 | 0.917055952         | 0.002901927 | lab   | Y                  |
| MEAN CORP. HGB                                                                                                              | 0.032618618        | -0.0396916   | 0.961085793         | 0.008396058 | lab   | N                  |
| medicaid                                                                                                                    | 0.031659207        | 0.159002897  | 1.172341343         | 0.187813075 | demo  | N                  |
| RESPIRATIONS                                                                                                                | 0.028930863        | 0.044547228  | 1.046981541         | 0.001144948 | vital | N                  |
| chronic hypertension                                                                                                        | 0.027141798        | 0.008299004  | 1.006927645         | 0.001890334 | dx    | Y                  |
| WEIGHT                                                                                                                      | 0.025493696        | 0.006233304  | 1.006271732         | 0.001307854 | vital | Y                  |
| Residual codes; unclassified                                                                                                | 0.025284996        | -0.004883181 | 0.996869887         | 0.000813826 | dx    | N                  |
| decreased fetal movement                                                                                                    | 0.024260535        | 0.006941224  | 1.007660168         | 0.000256835 | dx    | N                  |
| Hispanic                                                                                                                    | 0.015932268        | 0.356425473  | 1.428215086         | 0.047964851 | demo  | N                  |
| Labetalol                                                                                                                   | 0.010603545        | 0.029787345  | 1.030235426         | 2.88E-33    | rx    | N                  |
| mental health                                                                                                               | 0.010160836        | 0.01181943   | 1.012007109         | 0.001298682 | dx    | N                  |
| pe_hist                                                                                                                     | 0.008054557        | 1.898771907  | 6.677688583         | 2.02E-11    | demo  | Y                  |
| twin pregnancy                                                                                                              | 0.006906508        | 0.011611433  | 1.012797965         | 1.12E-05    | dx    | N                  |
| Other circulatory disease                                                                                                   | 0.006237221        | 0.006950202  | 1.007174409         | 0.00536639  | dx    | N                  |
| first_drink_impact_day                                                                                                      | 0.003864094        | 0.272437872  | 1.313161872         | 0.003097715 | demo  | N                  |
| Other endocrine disorders                                                                                                   | 0.002160961        | 0.01208437   | 1.010729811         | 0.000606789 | dx    | N                  |
| Hypertension with complications and secondary hypertension                                                                  | 0.00192391         | 0.021280143  | 1.019747704         | 0.000317305 | dx    | Y                  |
| first_smk_impact_day                                                                                                        | 0.001369617        | 0.049109645  | 1.050335508         | 0.72639165  | demo  | N                  |
| Laparoscopy, surgical; cholecystectomy                                                                                      | 0.000887704        | 0.037601009  | 1.038316871         | 0.028805294 | proc  | N                  |
| Endocervical curettage (not done as part of a dilation and curettage)                                                       | 0.000733898        | 0.03674391   | 1.037427312         | 0.021154699 | proc  | N                  |
| Laparoscopy, surgical, repair, ventral, umbilical, spigelian or epigastric hernia (includes mesh insertion, when performed) | 0                  | 0.04337429   | 1.044328703         | 0.015733315 | proc  | N                  |

**Supplementary Table 19: Selected unique features for model postpartum (continued)**

| <b>Source feature</b>                                                                                                            | <b>Feature importance</b> | <b>Estimate</b> | <b>Adjusted odds ratio</b> | <b>p_value</b> | <b>type</b> | <b>Known associations</b> |
|----------------------------------------------------------------------------------------------------------------------------------|---------------------------|-----------------|----------------------------|----------------|-------------|---------------------------|
| <b>Total abdominal hysterectomy (corpus and cervix), with or without removal of tube(s), with or without removal of ovary(s)</b> | 0                         | 0.020873501     | 1.021092877                | 0.023667936    | proc        | N                         |
| <b>Laparoscopic treatment of ectopic pregnancy; without salpingectomy and/or oophorectomy</b>                                    | 0                         | 0.134467869     | 1.143927902                | 0.030601679    | proc        | N                         |
| <b>Asian</b>                                                                                                                     | 0                         | -0.062982727    | 0.938959692                | 0.782407711    | demo        | N                         |
| <b>hellp syndrome (severe preeclampsia that affects liver, platelets, hemolysis)</b>                                             | 0                         | 0.060868247     | 1.054113349                | 8.58E-10       | dx          | N                         |
| <b>miscarriage</b>                                                                                                               | 0                         | -0.055010964    | 0.94647477                 | 0.848525972    | demo        | N                         |

**Supplementary Table 20: Metrics for MSH training dataset**

| week        | ACOG (high risk factors) AUC | ACOG (all risk factors) AUC | SEN                  | SPE                  | F1 score             | ACC                  | PPV                  | NPV                  | AUC                  | AP                   |                      |                      |
|-------------|------------------------------|-----------------------------|----------------------|----------------------|----------------------|----------------------|----------------------|----------------------|----------------------|----------------------|----------------------|----------------------|
| 4           | 0.621 [0.617, 0.626]         | 0.671 [0.666, 0.677]        | 0.538 [0.523, 0.562] | 0.752 [0.743, 0.762] | 0.066 [0.065, 0.068] | 0.749 [0.739, 0.758] | 0.035 [0.034, 0.036] | 0.990 [0.989, 0.990] | 0.688 [0.680, 0.696] | 0.081 [0.064, 0.096] |                      |                      |
| 8           |                              |                             | 0.534 [0.533, 0.575] | 0.790 [0.788, 0.794] | 0.079 [0.077, 0.081] | 0.787 [0.784, 0.789] | 0.042 [0.042, 0.043] | 0.990 [0.990, 0.991] | 0.707 [0.694, 0.732] | 0.099 [0.060, 0.117] |                      |                      |
| 12          |                              |                             | 0.528 [0.493, 0.534] | 0.845 [0.828, 0.855] | 0.094 [0.090, 0.098] | 0.839 [0.824, 0.848] | 0.052 [0.049, 0.054] | 0.991 [0.990, 0.991] | 0.739 [0.730, 0.750] | 0.091 [0.079, 0.113] |                      |                      |
| 16          |                              |                             | 0.533 [0.503, 0.569] | 0.844 [0.837, 0.855] | 0.100 [0.099, 0.104] | 0.839 [0.833, 0.849] | 0.055 [0.054, 0.058] | 0.991 [0.990, 0.992] | 0.747 [0.742, 0.763] | 0.096 [0.096, 0.106] |                      |                      |
| 20          |                              |                             | 0.551 [0.496, 0.562] | 0.856 [0.843, 0.864] | 0.103 [0.098, 0.109] | 0.850 [0.839, 0.858] | 0.057 [0.054, 0.062] | 0.991 [0.990, 0.992] | 0.764 [0.758, 0.777] | 0.103 [0.090, 0.114] |                      |                      |
| 22          |                              |                             | 0.534 [0.511, 0.597] | 0.857 [0.840, 0.867] | 0.110 [0.098, 0.117] | 0.852 [0.836, 0.862] | 0.061 [0.054, 0.065] | 0.991 [0.990, 0.992] | 0.765 [0.762, 0.777] | 0.105 [0.081, 0.142] |                      |                      |
| 24          |                              |                             | 0.547 [0.518, 0.575] | 0.863 [0.855, 0.875] | 0.114 [0.103, 0.121] | 0.859 [0.850, 0.869] | 0.063 [0.057, 0.068] | 0.991 [0.991, 0.992] | 0.775 [0.770, 0.783] | 0.114 [0.109, 0.145] |                      |                      |
| 26          |                              |                             | 0.568 [0.529, 0.584] | 0.863 [0.854, 0.873] | 0.118 [0.115, 0.126] | 0.858 [0.850, 0.868] | 0.065 [0.064, 0.071] | 0.992 [0.991, 0.992] | 0.786 [0.781, 0.800] | 0.141 [0.118, 0.149] |                      |                      |
| 28          |                              |                             | 0.583 [0.514, 0.626] | 0.888 [0.879, 0.898] | 0.137 [0.130, 0.151] | 0.883 [0.873, 0.894] | 0.079 [0.073, 0.085] | 0.992 [0.991, 0.993] | 0.814 [0.786, 0.838] | 0.148 [0.128, 0.189] |                      |                      |
| 30          |                              |                             | 0.577 [0.572, 0.610] | 0.887 [0.882, 0.902] | 0.149 [0.127, 0.158] | 0.883 [0.878, 0.896] | 0.084 [0.071, 0.091] | 0.992 [0.992, 0.993] | 0.820 [0.805, 0.831] | 0.186 [0.150, 0.200] |                      |                      |
| 32          |                              |                             | 0.594 [0.561, 0.623] | 0.911 [0.908, 0.920] | 0.165 [0.160, 0.183] | 0.907 [0.904, 0.914] | 0.096 [0.092, 0.106] | 0.993 [0.992, 0.994] | 0.835 [0.824, 0.851] | 0.214 [0.199, 0.243] |                      |                      |
| 34          |                              |                             | 0.666 [0.586, 0.728] | 0.925 [0.919, 0.936] | 0.197 [0.174, 0.218] | 0.922 [0.914, 0.931] | 0.116 [0.100, 0.131] | 0.995 [0.993, 0.996] | 0.852 [0.848, 0.868] | 0.234 [0.185, 0.316] |                      |                      |
| 35          |                              |                             | 0.701 [0.666, 0.727] | 0.933 [0.929, 0.943] | 0.219 [0.186, 0.232] | 0.929 [0.926, 0.941] | 0.130 [0.110, 0.139] | 0.996 [0.995, 0.996] | 0.869 [0.864, 0.907] | 0.242 [0.197, 0.284] |                      |                      |
| 36          |                              |                             | 0.768 [0.714, 0.800] | 0.934 [0.929, 0.947] | 0.215 [0.195, 0.247] | 0.932 [0.927, 0.944] | 0.127 [0.112, 0.146] | 0.997 [0.996, 0.998] | 0.895 [0.884, 0.920] | 0.259 [0.232, 0.298] |                      |                      |
| 37          |                              |                             | 0.776 [0.762, 0.809] | 0.929 [0.927, 0.943] | 0.168 [0.161, 0.183] | 0.928 [0.926, 0.941] | 0.094 [0.089, 0.104] | 0.998 [0.998, 0.998] | 0.915 [0.885, 0.924] | 0.180 [0.170, 0.197] |                      |                      |
| 38          |                              |                             | 0.775 [0.697, 0.811] | 0.936 [0.913, 0.950] | 0.141 [0.110, 0.166] | 0.934 [0.912, 0.949] | 0.077 [0.059, 0.093] | 0.998 [0.998, 0.999] | 0.906 [0.889, 0.922] | 0.113 [0.078, 0.140] |                      |                      |
| 39          |                              |                             | 0.697 [0.617, 0.816] | 0.951 [0.942, 0.957] | 0.100 [0.088, 0.138] | 0.948 [0.941, 0.956] | 0.053 [0.047, 0.077] | 0.998 [0.998, 0.999] | 0.898 [0.885, 0.929] | 0.076 [0.058, 0.085] |                      |                      |
| Intrapartum |                              |                             | N/A                  | N/A                  | 0.646 [0.620, 0.650] | 0.841 [0.839, 0.843] | 0.322 [0.315, 0.328] | 0.828 [0.825, 0.830] | 0.215 [0.210, 0.220] | 0.972 [0.970, 0.972] | 0.820 [0.815, 0.825] | 0.352 [0.338, 0.361] |
| Postpartum  |                              |                             | N/A                  | N/A                  | 0.530 [0.479, 0.572] | 0.951 [0.948, 0.963] | 0.195 [0.176, 0.224] | 0.946 [0.943, 0.958] | 0.118 [0.105, 0.147] | 0.994 [0.994, 0.995] | 0.893 [0.888, 0.899] | 0.194 [0.182, 0.244] |

**Supplementary Table 21: Preeclampsia prevalence, sample size, number of features and percentage of missing values at different datasets**

| week         | Mount Sinai Hospital (MSH) training set |             |           |           | Mount Sinai Hospital (MSH) test set |             |           |           | Mount Sinai West/UW/BI/SL (MSW) test set |             |          |           |
|--------------|-----------------------------------------|-------------|-----------|-----------|-------------------------------------|-------------|-----------|-----------|------------------------------------------|-------------|----------|-----------|
|              | prevalence                              | sample size | feature # | missing % | prevalence                          | sample size | feature # | missing % | prevalence                               | sample size | number # | missing % |
| <b>4</b>     | 2.16%                                   | 55374       | 2989      | 37.58%    | 1.31%                               | 33379       | 2989      | 38.04%    | 1.57%                                    | 8941        | 2989     | 37.44%    |
| <b>8</b>     | 2.16%                                   | 55344       | 3057      | 35.88%    | 1.31%                               | 33379       | 3057      | 36.88%    | 1.57%                                    | 8941        | 3057     | 35.17%    |
| <b>12</b>    | 2.16%                                   | 55308       | 3123      | 34.15%    | 1.31%                               | 33379       | 3123      | 35.67%    | 1.57%                                    | 8941        | 3123     | 32.78%    |
| <b>16</b>    | 2.16%                                   | 55275       | 3166      | 33.28%    | 1.31%                               | 33351       | 3166      | 34.98%    | 1.57%                                    | 8940        | 3166     | 31.91%    |
| <b>20</b>    | 2.16%                                   | 55210       | 3203      | 32.66%    | 1.32%                               | 33218       | 3203      | 34.50%    | 1.57%                                    | 8935        | 3203     | 31.38%    |
| <b>22</b>    | 2.17%                                   | 55134       | 3219      | 32.39%    | 1.32%                               | 33127       | 3219      | 34.29%    | 1.57%                                    | 8925        | 3219     | 31.13%    |
| <b>24</b>    | 2.17%                                   | 55002       | 3228      | 32.19%    | 1.31%                               | 33021       | 3228      | 34.15%    | 1.57%                                    | 8914        | 3228     | 30.95%    |
| <b>26</b>    | 2.16%                                   | 54838       | 3244      | 31.86%    | 1.29%                               | 32860       | 3244      | 33.91%    | 1.55%                                    | 8899        | 3244     | 30.58%    |
| <b>28</b>    | 2.15%                                   | 54651       | 3259      | 31.50%    | 1.29%                               | 32744       | 3259      | 33.66%    | 1.55%                                    | 8882        | 3259     | 30.27%    |
| <b>30</b>    | 2.13%                                   | 54415       | 3270      | 31.22%    | 1.25%                               | 32595       | 3270      | 33.43%    | 1.56%                                    | 8867        | 3270     | 30.02%    |
| <b>32</b>    | 2.09%                                   | 54040       | 3291      | 30.90%    | 1.19%                               | 32380       | 3291      | 33.18%    | 1.52%                                    | 8830        | 3291     | 29.75%    |
| <b>34</b>    | 1.98%                                   | 53274       | 3294      | 30.74%    | 1.06%                               | 31965       | 3294      | 33.05%    | 1.39%                                    | 8765        | 3294     | 29.59%    |
| <b>35</b>    | 1.90%                                   | 52573       | 3293      | 30.70%    | 0.95%                               | 31581       | 3293      | 33.04%    | 1.32%                                    | 8700        | 3293     | 29.55%    |
| <b>36</b>    | 1.80%                                   | 51171       | 3268      | 30.92%    | 0.89%                               | 30975       | 3268      | 33.27%    | 1.22%                                    | 8585        | 3268     | 29.75%    |
| <b>37</b>    | 1.48%                                   | 47941       | 3204      | 31.54%    | 0.74%                               | 29392       | 3204      | 33.86%    | 1.11%                                    | 8267        | 3204     | 30.27%    |
| <b>38</b>    | 1.25%                                   | 41989       | 3104      | 32.60%    | 0.58%                               | 26161       | 3104      | 34.89%    | 0.77%                                    | 7418        | 3104     | 31.23%    |
| <b>39</b>    | 1.08%                                   | 29064       | 2903      | 35.00%    | 0.51%                               | 19663       | 2903      | 37.26%    | 0.56%                                    | 5920        | 2903     | 33.44%    |
| <b>Intra</b> | 6.42%                                   | 59148       | 4136      | 43.43%    | 3.51%                               | 34118       | 4136      | 44.72%    | 2.27%                                    | 9002        | 4136     | 42.38%    |
| <b>Post</b>  | 1.19%                                   | 55842       | 5391      | 48.44%    | 0.83%                               | 36520       | 5391      | 49.32%    | 0.58%                                    | 8894        | 5391     | 46.87%    |

**Supplementary Table 22: Validation performance at MSH test dataset**

| week        | ACOG (high risk factors) AUC | ACOG (all risk factors) AUC | SEN                  | SPE                  | F1 score             | ACC                  | PPV                  | NPV                  | AUC                  | AP                   |                      |                      |
|-------------|------------------------------|-----------------------------|----------------------|----------------------|----------------------|----------------------|----------------------|----------------------|----------------------|----------------------|----------------------|----------------------|
| 4           | 0.583 [0.577, 0.589]         | 0.662 [0.653, 0.672]        | 0.440 [0.427, 0.452] | 0.821 [0.806, 0.832] | 0.062 [0.059, 0.063] | 0.816 [0.801, 0.826] | 0.033 [0.032, 0.034] | 0.990 [0.990, 0.990] | 0.658 [0.655, 0.668] | 0.048 [0.046, 0.049] |                      |                      |
| 8           |                              |                             | 0.578 [0.565, 0.596] | 0.795 [0.769, 0.809] | 0.112 [0.106, 0.115] | 0.790 [0.766, 0.803] | 0.062 [0.058, 0.064] | 0.988 [0.987, 0.988] | 0.755 [0.749, 0.764] | 0.085 [0.083, 0.093] |                      |                      |
| 12          |                              |                             | 0.552 [0.527, 0.562] | 0.814 [0.798, 0.829] | 0.116 [0.111, 0.122] | 0.808 [0.793, 0.823] | 0.065 [0.061, 0.069] | 0.987 [0.987, 0.988] | 0.744 [0.738, 0.746] | 0.091 [0.085, 0.095] |                      |                      |
| 16          |                              |                             | 0.580 [0.552, 0.596] | 0.797 [0.770, 0.812] | 0.113 [0.104, 0.123] | 0.791 [0.765, 0.806] | 0.063 [0.057, 0.069] | 0.987 [0.987, 0.988] | 0.741 [0.732, 0.745] | 0.106 [0.099, 0.111] |                      |                      |
| 20          |                              |                             | 0.546 [0.517, 0.578] | 0.831 [0.792, 0.846] | 0.126 [0.114, 0.131] | 0.824 [0.787, 0.838] | 0.071 [0.063, 0.074] | 0.987 [0.987, 0.987] | 0.748 [0.742, 0.751] | 0.121 [0.108, 0.127] |                      |                      |
| 22          |                              |                             | 0.554 [0.516, 0.596] | 0.825 [0.786, 0.854] | 0.125 [0.115, 0.133] | 0.818 [0.781, 0.846] | 0.071 [0.064, 0.077] | 0.987 [0.986, 0.988] | 0.758 [0.751, 0.759] | 0.104 [0.093, 0.116] |                      |                      |
| 24          |                              |                             | 0.565 [0.554, 0.580] | 0.828 [0.809, 0.847] | 0.129 [0.122, 0.145] | 0.821 [0.803, 0.841] | 0.073 [0.068, 0.083] | 0.987 [0.987, 0.988] | 0.761 [0.758, 0.772] | 0.120 [0.115, 0.141] |                      |                      |
| 26          |                              |                             | 0.584 [0.564, 0.599] | 0.823 [0.811, 0.856] | 0.135 [0.129, 0.157] | 0.817 [0.806, 0.849] | 0.076 [0.073, 0.091] | 0.987 [0.987, 0.988] | 0.786 [0.776, 0.790] | 0.141 [0.134, 0.179] |                      |                      |
| 28          |                              |                             | 0.593 [0.585, 0.612] | 0.858 [0.848, 0.877] | 0.166 [0.160, 0.179] | 0.852 [0.842, 0.870] | 0.096 [0.092, 0.106] | 0.989 [0.988, 0.989] | 0.801 [0.798, 0.805] | 0.200 [0.169, 0.208] |                      |                      |
| 30          |                              |                             | 0.619 [0.606, 0.631] | 0.867 [0.858, 0.884] | 0.176 [0.171, 0.194] | 0.861 [0.852, 0.877] | 0.103 [0.099, 0.115] | 0.989 [0.989, 0.989] | 0.815 [0.812, 0.820] | 0.251 [0.245, 0.257] |                      |                      |
| 32          |                              |                             | 0.652 [0.634, 0.662] | 0.873 [0.852, 0.885] | 0.193 [0.167, 0.199] | 0.869 [0.847, 0.879] | 0.112 [0.096, 0.118] | 0.990 [0.990, 0.990] | 0.829 [0.825, 0.832] | 0.257 [0.236, 0.271] |                      |                      |
| 34          |                              |                             | 0.613 [0.587, 0.630] | 0.903 [0.885, 0.917] | 0.213 [0.197, 0.239] | 0.896 [0.879, 0.909] | 0.129 [0.117, 0.148] | 0.990 [0.989, 0.990] | 0.834 [0.830, 0.837] | 0.291 [0.274, 0.320] |                      |                      |
| 35          |                              |                             | 0.620 [0.615, 0.641] | 0.912 [0.908, 0.931] | 0.223 [0.216, 0.260] | 0.905 [0.902, 0.924] | 0.136 [0.130, 0.164] | 0.991 [0.991, 0.991] | 0.852 [0.849, 0.854] | 0.277 [0.254, 0.319] |                      |                      |
| 36          |                              |                             | 0.645 [0.633, 0.673] | 0.920 [0.913, 0.934] | 0.233 [0.224, 0.261] | 0.914 [0.908, 0.928] | 0.142 [0.135, 0.164] | 0.992 [0.992, 0.993] | 0.868 [0.862, 0.871] | 0.277 [0.232, 0.336] |                      |                      |
| 37          |                              |                             | 0.668 [0.659, 0.682] | 0.918 [0.911, 0.929] | 0.225 [0.205, 0.239] | 0.914 [0.907, 0.924] | 0.135 [0.122, 0.146] | 0.993 [0.993, 0.994] | 0.865 [0.859, 0.870] | 0.183 [0.178, 0.215] |                      |                      |
| 38          |                              |                             | 0.615 [0.584, 0.662] | 0.923 [0.887, 0.941] | 0.162 [0.129, 0.192] | 0.919 [0.884, 0.936] | 0.094 [0.072, 0.115] | 0.995 [0.994, 0.995] | 0.844 [0.834, 0.851] | 0.126 [0.104, 0.172] |                      |                      |
| 39          |                              |                             | 0.548 [0.540, 0.602] | 0.943 [0.920, 0.945] | 0.171 [0.150, 0.182] | 0.938 [0.916, 0.940] | 0.103 [0.086, 0.109] | 0.994 [0.994, 0.995] | 0.834 [0.824, 0.839] | 0.108 [0.092, 0.131] |                      |                      |
| Intrapartum |                              |                             | N/A                  | N/A                  | 0.444 [0.437, 0.453] | 0.925 [0.919, 0.929] | 0.268 [0.263, 0.272] | 0.907 [0.901, 0.910] | 0.194 [0.185, 0.196] | 0.976 [0.976, 0.977] | 0.833 [0.831, 0.834] | 0.208 [0.205, 0.211] |
| Postpartum  |                              |                             | N/A                  | N/A                  | 0.516 [0.491, 0.543] | 0.950 [0.941, 0.953] | 0.138 [0.126, 0.139] | 0.946 [0.937, 0.949] | 0.080 [0.071, 0.081] | 0.996 [0.996, 0.996] | 0.842 [0.841, 0.846] | 0.108 [0.105, 0.111] |

**Supplementary Table 23: Validation performance at MSW test dataset**

| week        | ACOG (high risk factors) AUC | ACOG (all risk factors) AUC | SEN                  | SPE                  | F1 score             | ACC                  | PPV                  | NPV                  | AUC                  | AP                   |                      |                      |
|-------------|------------------------------|-----------------------------|----------------------|----------------------|----------------------|----------------------|----------------------|----------------------|----------------------|----------------------|----------------------|----------------------|
| 4           | 0.575 [0.563, 0.587]         | 0.640 [0.624, 0.659]        | 0.486 [0.465, 0.517] | 0.772 [0.766, 0.787] | 0.063 [0.062, 0.066] | 0.768 [0.762, 0.781] | 0.034 [0.033, 0.035] | 0.989 [0.989, 0.990] | 0.675 [0.664, 0.678] | 0.045 [0.042, 0.049] |                      |                      |
| 8           |                              |                             | 0.617 [0.601, 0.633] | 0.769 [0.760, 0.782] | 0.079 [0.076, 0.082] | 0.766 [0.758, 0.779] | 0.042 [0.040, 0.044] | 0.992 [0.992, 0.992] | 0.769 [0.759, 0.782] | 0.058 [0.056, 0.065] |                      |                      |
| 12          |                              |                             | 0.522 [0.491, 0.539] | 0.820 [0.801, 0.835] | 0.089 [0.087, 0.096] | 0.815 [0.797, 0.829] | 0.049 [0.047, 0.053] | 0.989 [0.989, 0.990] | 0.747 [0.746, 0.758] | 0.062 [0.061, 0.069] |                      |                      |
| 16          |                              |                             | 0.561 [0.530, 0.577] | 0.808 [0.793, 0.828] | 0.089 [0.084, 0.098] | 0.804 [0.788, 0.824] | 0.048 [0.045, 0.054] | 0.991 [0.990, 0.991] | 0.751 [0.738, 0.757] | 0.060 [0.057, 0.067] |                      |                      |
| 20          |                              |                             | 0.533 [0.521, 0.590] | 0.825 [0.799, 0.840] | 0.090 [0.085, 0.096] | 0.820 [0.796, 0.835] | 0.049 [0.045, 0.053] | 0.991 [0.991, 0.991] | 0.775 [0.769, 0.778] | 0.072 [0.068, 0.076] |                      |                      |
| 22          |                              |                             | 0.574 [0.541, 0.602] | 0.795 [0.774, 0.834] | 0.088 [0.085, 0.098] | 0.791 [0.771, 0.829] | 0.048 [0.046, 0.054] | 0.991 [0.991, 0.991] | 0.777 [0.767, 0.781] | 0.069 [0.068, 0.073] |                      |                      |
| 24          |                              |                             | 0.562 [0.554, 0.596] | 0.819 [0.799, 0.838] | 0.097 [0.090, 0.101] | 0.815 [0.795, 0.833] | 0.053 [0.049, 0.056] | 0.991 [0.991, 0.991] | 0.782 [0.773, 0.786] | 0.082 [0.079, 0.085] |                      |                      |
| 26          |                              |                             | 0.564 [0.538, 0.580] | 0.819 [0.812, 0.836] | 0.094 [0.091, 0.103] | 0.814 [0.808, 0.832] | 0.051 [0.050, 0.057] | 0.991 [0.991, 0.991] | 0.775 [0.773, 0.787] | 0.087 [0.081, 0.094] |                      |                      |
| 28          |                              |                             | 0.570 [0.545, 0.586] | 0.842 [0.825, 0.866] | 0.108 [0.102, 0.119] | 0.837 [0.821, 0.861] | 0.060 [0.056, 0.067] | 0.991 [0.991, 0.991] | 0.800 [0.794, 0.805] | 0.121 [0.114, 0.124] |                      |                      |
| 30          |                              |                             | 0.581 [0.552, 0.603] | 0.852 [0.817, 0.866] | 0.116 [0.103, 0.123] | 0.847 [0.813, 0.861] | 0.065 [0.056, 0.069] | 0.991 [0.991, 0.991] | 0.785 [0.778, 0.790] | 0.120 [0.114, 0.123] |                      |                      |
| 32          |                              |                             | 0.564 [0.530, 0.582] | 0.861 [0.837, 0.886] | 0.125 [0.105, 0.138] | 0.856 [0.832, 0.880] | 0.070 [0.058, 0.079] | 0.991 [0.991, 0.991] | 0.797 [0.786, 0.804] | 0.141 [0.135, 0.148] |                      |                      |
| 34          |                              |                             | 0.504 [0.476, 0.550] | 0.889 [0.860, 0.912] | 0.121 [0.107, 0.141] | 0.883 [0.855, 0.905] | 0.069 [0.059, 0.082] | 0.991 [0.991, 0.992] | 0.806 [0.801, 0.816] | 0.139 [0.128, 0.153] |                      |                      |
| 35          |                              |                             | 0.486 [0.455, 0.514] | 0.917 [0.907, 0.945] | 0.139 [0.136, 0.180] | 0.910 [0.901, 0.937] | 0.081 [0.079, 0.112] | 0.992 [0.991, 0.992] | 0.823 [0.815, 0.827] | 0.148 [0.134, 0.169] |                      |                      |
| 36          |                              |                             | 0.515 [0.483, 0.534] | 0.921 [0.913, 0.943] | 0.144 [0.131, 0.173] | 0.915 [0.908, 0.937] | 0.083 [0.075, 0.104] | 0.993 [0.993, 0.993] | 0.825 [0.815, 0.832] | 0.124 [0.110, 0.143] |                      |                      |
| 37          |                              |                             | 0.449 [0.351, 0.478] | 0.940 [0.936, 0.956] | 0.144 [0.131, 0.152] | 0.934 [0.930, 0.948] | 0.086 [0.083, 0.091] | 0.992 [0.991, 0.993] | 0.823 [0.817, 0.825] | 0.093 [0.090, 0.105] |                      |                      |
| 38          |                              |                             | 0.307 [0.123, 0.496] | 0.953 [0.905, 0.976] | 0.075 [0.067, 0.104] | 0.948 [0.902, 0.969] | 0.044 [0.039, 0.070] | 0.994 [0.992, 0.995] | 0.791 [0.766, 0.799] | 0.059 [0.049, 0.062] |                      |                      |
| 39          |                              |                             | 0.141 [0.102, 0.375] | 0.983 [0.956, 0.989] | 0.078 [0.063, 0.094] | 0.978 [0.953, 0.984] | 0.049 [0.042, 0.059] | 0.995 [0.995, 0.996] | 0.799 [0.778, 0.809] | 0.039 [0.033, 0.049] |                      |                      |
| Intrapartum |                              |                             | N/A                  | N/A                  | 0.325 [0.313, 0.345] | 0.882 [0.879, 0.885] | 0.105 [0.101, 0.106] | 0.869 [0.867, 0.872] | 0.062 [0.060, 0.064] | 0.982 [0.982, 0.983] | 0.739 [0.734, 0.743] | 0.055 [0.054, 0.058] |
| Postpartum  |                              |                             | N/A                  | N/A                  | 0.596 [0.567, 0.630] | 0.942 [0.934, 0.949] | 0.101 [0.094, 0.114] | 0.940 [0.932, 0.947] | 0.057 [0.051, 0.063] | 0.998 [0.997, 0.998] | 0.896 [0.881, 0.898] | 0.095 [0.091, 0.115] |



**Supplementary Table 24: Comparisons of prediction performances and features with existing models**

| Study                                        | AUC (IQ or 95%CI) <sup>a</sup> | Maternal characteristics | History of preeclampsia | Biochemical markers | Doppler | Laboratory results | Time-varying model |
|----------------------------------------------|--------------------------------|--------------------------|-------------------------|---------------------|---------|--------------------|--------------------|
| Our model (week 16)                          | 0.75 (IQ: 0.74-0.76)           | ✓                        | ✓                       |                     |         | ✓                  | ✓                  |
| Our model (week 34)                          | 0.85 (IQ: 0.84-0.87)           | ✓                        | ✓                       |                     |         | ✓                  | ✓                  |
| Marić et al, 2020 <sup>1</sup><br>(week 16)  | 0.79 (0.75-0.83)               | ✓                        | ✓                       |                     |         | ✓                  |                    |
| Wright et al, 2019 <sup>2</sup><br>(week 13) | 0.83 (0.81-0.84)               | ✓                        | ✓                       | ✓                   | ✓       |                    |                    |
| Wright et al, 2015 <sup>3</sup><br>(week 13) | 0.756                          | ✓                        | ✓                       |                     |         |                    |                    |
| Myatt et al, 2012 <sup>4</sup><br>(week 12)  | 0.73 (0.69-0.77)               | ✓                        | ✓                       | ✓                   |         | ✓                  |                    |
| Odibo et al, 2011 <sup>5</sup><br>(week 14)  | 0.77 (0.63-0.81)               | ✓                        | ✓                       | ✓                   | ✓       |                    |                    |
| North et al, 2011 <sup>6</sup><br>(week 21)  | 0.71                           | ✓                        |                         |                     |         |                    |                    |
| Yu et al, 2005 <sup>7</sup><br>(week 24)     | 0.83                           | ✓                        | ✓                       |                     | ✓       |                    |                    |
| ACOG – all risk factors<br>(week 4)          | 0.67 (IQ: 0.67-0.68)           | ✓                        | ✓                       |                     |         |                    |                    |

- a. All of the AUCs listed are estimated from the training data set provided from the original manuscripts. Specifically, Marić et al. 2020 computed the AUC used 4-fold cross validation repeated 5 times; North et al. 2011 calculated the AUC by using 10-fold cross-validation repeated 10 times. Wright et al. 2015 used 5-fold single cross-validation. The AUCs listed from Wright et al. 2019, Myatt et al. 2012, Odibo et al. 2011, and Yu et al. 2005 were derived from training data using the predictive model fitted to training data without cross-validation.

**Supplementary Table 25: Clinical feature characteristics for each patient across pregnancy**

| <b>Feature type</b>            | <b>Overall (std)</b> | <b>prior pregnancy (std)</b> | <b>pregnancy to delivery (std)</b> | <b>Postpartum (std)</b> |
|--------------------------------|----------------------|------------------------------|------------------------------------|-------------------------|
| <b>Procedures by CPT4</b>      | 1.12 (0.43)          | 1.09 (0.34)                  | 1.05 (0.24)                        | 1.23 (0.49)             |
| <b>Diagnosis by ICD9/10</b>    | 21.75 (17.16)        | 10.17 (6.67)                 | 18.62 (14.51)                      | 7.8 (8.48)              |
| <b>labs by LOINC</b>           | 35.24 (19.03)        | 19.99 (12.33)                | 32.74 (16.97)                      | 23.24 (17.89)           |
| <b>Drugs by Name</b>           | 10.63 (8.35)         | 5.63 (4.95)                  | 7.27 (5.58)                        | 4.89 (5.71)             |
| <b># of vital measurements</b> | 246.9 (273.76)       | 97.57 (140.34)               | 160.13 (192.95)                    | 49.63 (130.3)           |

## Supplementary References

1. Marić, I. *et al.* Early prediction of preeclampsia via machine learning. *Am. J. Obstet. Gynecol. MFM* **2**, 100100 (2020).
2. Wright, D. *et al.* Predictive performance of the competing risk model in screening for preeclampsia. *Am. J. Obstet. Gynecol.* **220**, 199.e1-199.e13 (2019).
3. Wright, D., Syngelaki, A., Akolekar, R., Poon, L. C. & Nicolaides, K. H. Competing risks model in screening for preeclampsia by maternal characteristics and medical history. *Am. J. Obstet. Gynecol.* **213**, 62.e1-62.e10 (2015).
4. Myatt, L. *et al.* First-trimester prediction of preeclampsia in nulliparous women at low risk. *Obstet. Gynecol.* **119**, 1234–1242 (2012).
5. Odibo, A. O. *et al.* First-trimester placental protein 13, PAPP-A, uterine artery Doppler and maternal characteristics in the prediction of pre-eclampsia. *Placenta* **32**, 598–602 (2011).
6. North, R. A. *et al.* Clinical risk prediction for pre-eclampsia in nulliparous women: Development of model in international prospective cohort. *BMJ* **342**, (2011).
7. Yu, C. K. H., Smith, G. C. S., Papageorgiou, A. T., Cacho, A. M. & Nicolaides, K. H. An integrated model for the prediction of pre-eclampsia using maternal factors and uterine artery Doppler velocimetry in unselected low-risk women. *American Journal of Obstetrics and Gynecology* vol. 195 330 (2006).
